1 **Aurora kinase Ipl1 facilitates bilobed distribution of clustered**  
2 **kinetochores to ensure error-free chromosome segregation in**  
3 ***Candida albicans***

4

5 Neha Varshney<sup>1</sup> and Kaustuv Sanyal<sup>1\*</sup>

6

7 <sup>1</sup>Molecular Mycology Laboratory, Molecular Biology & Genetics Unit,  
8 Jawaharlal Nehru Centre for Advanced Scientific Research, Jakkur, Bangalore  
9 560064, India

10

11 \*Correspondence: Kaustuv Sanyal, <sup>1</sup>Molecular Mycology Laboratory, Molecular  
12 Biology & Genetics Unit, Jawaharlal Nehru Centre for Advanced Scientific Research,  
13 Jakkur, Bangalore 560 064, India  
14 Email: [sanyal@jncasr.ac.in](mailto:sanyal@jncasr.ac.in), Telephone: +91-80-2208 2878

15

16 **Running title:** Ipl1 maintains ploidy in *Candida albicans*

17

18 **Keywords:** Microtubules/kinetochore geometry/ploidy/anti-fungal drug resistance/  
19 kinetochore-microtubule attachments

20

21 **Abstract**

22 *Candida albicans*, an ascomycete, has an ability to switch to diverse morphological  
23 forms. While *C. albicans* is predominately diploid, it can tolerate aneuploidy as a  
24 survival strategy under stress. Aurora kinase B homolog Ipl1 is a critical ploidy  
25 regulator that controls microtubule dynamics and chromosome segregation in  
26 *Saccharomyces cerevisiae*. In this study, we show that Ipl1 in *C. albicans* has a longer  
27 activation loop than that of the well-studied ascomycete *S. cerevisiae*. Ipl1 localizes to  
28 the kinetochores during the G1/S phase and associates with the spindle during mitosis.  
29 Ipl1 regulates cell morphogenesis and is required for cell viability. Ipl1 monitors  
30 microtubule dynamics which is mediated by separation of spindle pole bodies. While  
31 Ipl1 is dispensable for maintaining structural integrity and clustering of kinetochores  
32 in *C. albicans*, it is required for the maintenance of kinetochore geometry to form  
33 bilobed structures along the mitotic spindle, a feature of Ipl1 that was not observed in  
34 other yeasts. Depletion of Ipl1 results in erroneous kinetochore-microtubule  
35 attachments leading to aneuploidy-associated resistance to fluconazole, the most  
36 common anti-fungal drug used to treat *Candida* infections. Taking together, we  
37 suggest that Ipl1 spatiotemporally ensures kinetochore geometry to facilitate bipolar  
38 spindle assembly crucial for ploidy maintenance in *C. albicans*.

39

40

## 41 **Introduction**

42 Faithful inheritance of the duplicated genetic material to the daughter cells during cell  
43 division relies on the process of accurate chromosome segregation. Members of the  
44 Aurora family of serine/threonine protein kinases regulate various processes during  
45 chromosome segregation such as chromosome condensation, kinetochore-microtubule  
46 (MT) interactions, spindle-assembly checkpoint (SAC), spindle dynamics and  
47 cytokinesis (Andrews. *et al.*, 2003, Carmena. & Earnshaw., 2003). In ascomyceteous  
48 budding yeast *Saccharomyces cerevisiae*, Ipl1 is the only Aurora protein kinase which  
49 confers the **Increase-in-ploidy** phenotype (Francisco & Chan, 1994, Chan & Botstein,  
50 1993, Biggins. *et al.*, 1999). The protein comprises of a highly conserved C-terminal  
51 catalytic domain and a diverged N-terminal domain. The C-terminal catalytic domain  
52 of the protein contains an activation loop motif between subdomains VII and VIII,  
53 and a destruction-box to direct the Anaphase Promoting Complex (APC)-dependent  
54 degradation (Giet & Prigent, 1999). Ipl1, as a part of Chromosome Passenger  
55 Complex (CPC), associates with Sli15, Bir1 and Nbl1, orthologues of the human  
56 Inner centromere protein INCENP, Survivin and Borealin respectively, and exhibits a  
57 dynamic localization throughout the cell cycle (Buvelot. *et al.*, 2003).

58 During chromosome segregation, the sister chromatids must attach to the opposite  
59 spindle poles to achieve bi-orientation before the onset of anaphase to segregate  
60 appropriately in daughter cells. Ipl1 senses the tension across the centromere (*CEN*),  
61 stabilizes the bi-oriented kinetochore-MT attachments and destabilizes the erroneous  
62 kinetochore-MT attachments by regulating the phosphorylation of kinetochore  
63 proteins such as Dam1, Ndc80 etc. (Kim. *et al.*, 1999, Tanaka. *et al.*, 2002,  
64 Cheeseman. *et al.*, 2002). In addition, Ipl1 has been shown to associate with the  
65 mitotic spindle to regulate its timely disassembly by phosphorylating microtubule-

66 associated proteins (MAPs) such as Bim1 and Ase1 (Kang. *et al.*, 2001, Zimniak. *et*  
67 *al.*, 2009, Woodruff. *et al.*, 2010).

68 *Candida albicans*, is the most prevalent human fungal pathogen, accounting for  
69 approximately 400,000 life-threatening infections per year (Brown *et al.*, 2012).

70 While it is a human commensal, it becomes an opportunistic pathogen and resides in  
71 the host with reduced immune competence or an imbalance of competing bacterial  
72 microflora (Berman, 2012). Azole-associated acquisition of aneuploidy is a well-  
73 elucidated mechanism that provides fitness during anti-fungal drug resistance in *C.*  
74 *albicans* (Selmecki *et al.*, 2009). One of these aneuploid states is the isochromosome  
75 5L (i(5L)) which has been shown to confer fluconazole resistance due to  
76 amplification of genes such as *TAC1* and *ERG11* present on the left arm of  
77 chromosome 7 (Selmecki *et al.*, 2006, Selmecki *et al.*, 2008). The virulence of the  
78 organism has been shown to be associated with the morphological transition between  
79 yeast and hyphal cells. In these morphological forms, the MT-associated motor  
80 proteins have been shown to regulate nuclear movements, chromosome segregation,  
81 and cytoskeleton remodeling (Finley *et al.*, 2008, Martin *et al.*, 2004, Sherwood &  
82 Bennett, 2008, Frazer *et al.*, 2015). Yeast and filamentous hypha, both exhibit  
83 variations in the length of the mitotic spindle, the former having shorter mitotic  
84 spindles of maximum of 8  $\mu\text{m}$  and the latter with a longer spindle MTs of maximum  
85 of 20  $\mu\text{m}$ , indicating that the cell morphology influences the length of MTs in the  
86 same organism (Barton & Gull, 1988, McCoy *et al.*, 2015). *C. albicans* genome  
87 encodes only one form of the kinesin-5 (Kip1) and kinesin-14 (Kar3Cik1) family  
88 motors in contrast to the two kinesin-5 (Kip1 and Cin8) and kinesin-14 (Kar3Cik1  
89 and Kar3Vik1) family motors in *S. cerevisiae* (Chua *et al.*, 2007, Frazer *et al.*, 2015).

90 *C. albicans* exhibits various cellular morphologies and provides an ideal system to

91 explore various features of MT dynamics during mitosis because of its extraordinary  
92 genomic plasticity to tolerate chromosomal alterations and ploidy changes under  
93 unfavorable conditions such as the presence of anti-fungal drugs (Sanyal, 2012).

94 The primary events of the mitotic cell cycle are largely conserved between *S.*  
95 *cerevisiae* and *C. albicans* both of which belong to the same phylum of Ascomycota  
96 although these two-yeast species diverged from a common ancestor >600 million  
97 years ago. The SPBs are embedded in the nuclear envelope (NE) that never breaks  
98 down resulting in a closed mitosis. The kinetochores remain clustered and are bound  
99 to the MTs throughout the cell cycle (Sanyal & Carbon, 2002, Roy *et al.*, 2011).

100 Further, the correlation of “one MT/kinetochore” established in *S. cerevisiae* having  
101 125 bp short point *CENs* seems to be conserved in *C. albicans* having 3-5 kb long  
102 CENP-A rich *CENs* (Joglekar *et al.*, 2008). However, in contrast to *S. cerevisiae*, the  
103 kinetochore architecture in *C. albicans* is stabilized in a coordinated interdependent  
104 manner by its individual components indicating that the kinetochore may not be a  
105 layered structure in *C. albicans* (Thakur & Sanyal, 2012). Depletion of essential  
106 kinetochore proteins from the different layers of the kinetochore results in kinetochore  
107 unclustering followed by a complete collapse of the kinetochore architecture and  
108 reduction in cellular levels of the centromere-specific histone CENP-A (Thakur &  
109 Sanyal, 2012, Roy *et al.*, 2011).

110 Here, we explored the function of Aurora kinase Ipl1 in the spatiotemporal regulation  
111 of the MT dynamics during chromosome segregation in *C. albicans*. Using a  
112 conditional promoter, we modulated the cellular levels of Aurora B kinase Ipl1 and  
113 demonstrated that Ipl1 regulates MT dynamics. Ipl1 maintains bilobed kinetochore  
114 organization and its geometry to ensure proper separation of chromatin to prevent  
115 aneuploidy-associated drug resistance.

116 **Results**

117 *A homolog of Ipl1 in C. albicans has a distinct activation loop*

118 C6\_02320C, annotated as the homolog of Ipl1 in *C. albicans* (CaIpl1) in the Candida  
119 Genome Database (<http://www.candidagenome.org/>), was identified through a  
120 BLAST search using the primary amino acid sequence of Ipl1 in *S. cerevisiae* as the  
121 query. The sequence of putative CaIpl1 encodes a serine-threonine protein kinase of  
122 530 amino acids long peptide with a predicted molecular weight of 62 kDa that shares  
123 a high degree of amino acid sequence similarity to Aurora kinases from other  
124 organisms (Supporting Information, Fig. S1) (Robert & Gouet, 2014). Aurora kinases  
125 have a characteristic catalytic domain which contains a conserved motif  
126 (DFGWSXXXXXXXX-RXTXCGTXDYLPE) in the activation loop domain between  
127 subdomains VII and VIII and a D2-type destruction box  
128 (LLXXXPXXRXXLXXXXXHPW), near its C terminus (Giet & Prigent, 1999).  
129 Strikingly, CaIpl1 contains an extended activation loop domain (residues 384-434)  
130 within the conserved catalytic domain (Supporting Information, Fig. S1A). In  
131 addition, it also contains the conserved destruction box sequence (residues 496-515)  
132 as a part of catalytic domain. We constructed a phylogenetic tree with putative Ipl1  
133 protein sequences from the members the *Saccharomycotina* species complex  
134 (Supporting Information, Fig. S1B). *C. albicans* belongs to the CTG clade in which  
135 the CTG codon is often translated as serine, rather than leucine (Turner & Butler,  
136 2014). CaIpl1 kinase branches off near the base of the clade consisting of the family  
137 *Pichiaceae*. Thus, our analysis suggests that Ipl1 protein in the CTG clade species  
138 significantly diverged from the same in the well-studied yeast *S. cerevisiae* (ScIpl1).

139

140 *Dynamic localization of Ipl1 during different stages of cell cycle in C. albicans*

141 To determine whether Ipl1 functions differently in *C. albicans* from that of the *S.*

142 *cerevisiae*, we examined the localization of Ipl1 in *C. albicans*. We functionally

143 expressed Ipl1-Protein-A from its native promoter in the strain *IPL1-TAP-URA3/IPL1*

144 (CNV1) (Puig *et al.*, 2001). Ipl1-Protein-A could be detected by western blot analysis

145 using lysates obtained after immunoprecipitation with IgG sepharose beads

146 (Supporting Information, Fig. S2). However, Ipl1 was found undetected by western

147 blot analysis using lysates obtained prior to immunoprecipitation, indicating that Ipl1

148 is expressed at a low level in *C. albicans*. Further, to visualize its subcellular

149 localization, we functionally expressed it as a fusion protein with 2xGFP at its C-

150 terminus under the native promoter of *IPL1* in the strain *IPL1p-IPL1-2xGFP-*

151 *HIS1/ipl1::FRT, NDC80/NDC80-RFP-ARG4* (CNV3) where the kinetochore protein

152 Ndc80 was tagged with RFP and co-expressed. Ipl1 co-localizes to the kinetochores

153 during the S-phase and metaphase (Fig. 1A). However, Ipl1 decorates the mitotic

154 spindle in anaphase but no nuclear localization of Ipl1 could be detected in post-

155 anaphase. In unbudded cells, Ipl1 was occasionally detected as a dot-like structure.

156 Thus, Ipl1 is localized to the kinetochore in a cell-cycle-dependent manner in *C.*

157 *albicans*, which is distinct from Ipl1's localization in *S. cerevisiae* (Buvelot. *et al.*,

158 2003, Tanaka. *et al.*, 2002, Biggins. *et al.*, 1999). We also studied the localization of

159 Ipl1-2xGFP in nocodazole-treated metaphase-arrested CNV3 cells. Majority of these

160 cells exhibited kinetochore localization of Ipl1 indicating that Ipl1 localizes to the

161 kinetochore under tension in *C. albicans* (Fig. 1B). We also noticed a higher

162 accumulation of Ipl1 at the kinetochore when kinetochore-MT interaction is perturbed

163 in nocodazole-treated cells (Fig. 1C).

164

165 *Depletion of Ipl1 leads to a loss in viability and multiple morphological defects*

166 To study the function of Ipl1 in *C. albicans*, we constructed its conditional mutant  
167 strain by placing *IPL1* under the regulatable *PCK1* promoter which is repressed in the  
168 presence of glucose (non-permissive) but expressed in the presence of succinate  
169 (permissive) (Fig. 2A) (Leuker *et al.*, 1997). Two independent conditional *ipl1*  
170 mutants *PCK1p-IPL1/ipl1::FRT* (CNV6 and CNV7) were constructed and were  
171 confirmed by Southern blot analysis (Supporting Information, Fig. S3A). The wild-  
172 type *IPL1/IPL1* (RM1000AH) and the conditional *ipl1* mutants, *PCK1p-*  
173 *IPL1/ipl1::FRT* (CNV6 and CNV7), when streaked for single colonies on the plates  
174 revealed that cells having depleted levels of Ipl1 could not form colonies with the  
175 same efficiency as that of the wild-type (Fig. 2A). Ipl1-depletion cells consistently  
176 produced smaller colonies of variable sizes as compared to those of wild-type strain  
177 (Fig. 2B). Next, we examined whether Ipl1 plays a role in regulating morphogenesis  
178 in *C. albicans* by growing cells of *PCK1p-IPL1/ipl1::FRT* (CNV6) under non-  
179 permissive conditions. Microscopic observations revealed that the majority of Ipl1-  
180 depleted cells were larger in size than the wild-type cells with altered cellular  
181 morphologies (Fig. 2C). We quantified different morphological phenotypes obtained  
182 upon depletion of Ipl1 and classified them as dividing (unbudded, small-budded,  
183 large-budded and elongated), terminal, branched, chained and complex (cells with  
184 two or more branches and trimers) cells. Importantly, in contrast to the wild-type  
185 cells, the Ipl1 depletion resulted in the significant accumulation of enlarged,  
186 branched, terminal and complex multimeric cells after 8 h of growth under non-  
187 permissive conditions (Fig. 2D), suggesting that Ipl1 depletion triggers altered  
188 morphogenesis in *C. albicans*. A viability assay was performed to determine if the  
189 altered morphologies contribute to increased cell death in Ipl1-depleted cells. A



190 significant reduction (~70%) in the viability of Ipl1-depleted cells after 8 h of growth  
191 in non-permissive conditions as compared to the wild-type cells revealed that Ipl1 is  
192 required for viability in *C. albicans* (Supporting Information, S3B). This result also  
193 explains our inability to obtain a null mutant of *ipl1*. Since Ipl1-depleted cells  
194 exhibited a significant drop in viability associated with dramatic morphological  
195 changes after 8 h of growth under non-permissive conditions, we performed  
196 subsequent experiments under similar conditions (unless specified) to study functions  
197 of the mutant *ipl1*.

198 *Depletion of Ipl1 induces the assembly of aberrant spindles with inappropriately*  
199 *separated spindle poles*

200 Next, we set out to determine why Ipl1-depleted cells exhibit severely altered  
201 morphologies of the organism. The controlled disassembly and reassembly of MT  
202 fibers regulate the architecture or the shape of a cell. It has been shown previously  
203 MT motor mutants of *kip1*, *kar3*, or *cik1* result in altered cellular morphologies in *C.*  
204 *albicans* (Frazer *et al.*, 2015, Chua *et al.*, 2007, Sherwood & Bennett, 2008). To test  
205 whether the aberrant morphologies in the Ipl1-depleted cells are due to altered MT  
206 dynamics, we first depleted Ipl1 in two independent mutant strains,  
207 *ipl1::FRT/PCK1p-IPL1* (CNV6 and CNV7) for 4 h and spotted them on the plates  
208 containing thiabendazole (40 µg/ml), a MT-depolymerizing agent. It must be noted  
209 that the depletion of Ipl1 for this experiment was done for only 4 h to avoid the  
210 formation of cells with altered cellular morphologies that could have affected the  
211 proper estimation of the cell number. Retardation in the growth of the Ipl1-depleted  
212 cells as compared to the wild-type in the presence of thiabendazole indicates that  
213 depletion of Ipl1 affects MT dynamics (Fig. 3A). Shifts in the temperatures are also  
214 known to modulate the depolymerization and polymerization dynamics of the MTs.

215 To confirm whether the MT dynamics is perturbed in the Ipl1-depleted cells, we  
216 spotted the Ipl1-depleted cells (CNV6 and CNV7) and the wild-type cells  
217 (RM1000AH) on glucose plates and incubated them at variable temperatures (30°C-  
218 42°C). As compared to the optimal temperature (30°C), Ipl1-depleted cells exhibited  
219 retarded growth at the higher temperatures (37°C and 42°C) (Fig. 3B). This result was  
220 similar to the growth defect observed in the *ipl1-2* mutant in *S. cerevisiae* and  
221 *kar3Δ/kar3Δ* mutant in *C. albicans* cells at higher temperatures (Sherwood & Bennett,  
222 2008, Robinson *et al.*, 2012). However, mutant of *ipl1* in *S. cerevisiae*, *ipl1-315*  
223 having reduced kinase activity displayed a different phenotype as these mutant cells  
224 could grow at 37°C (Kotwaliwale. *et al.*, 2007).

225 Next, we sought to determine the possible reasons for exhibiting severe defects in the  
226 MT dynamics by Ipl1-depleted cells in *C. albicans*. To test this, we first depleted Ipl1  
227 for 8 h in cells of *TUB1-GFP URA3/TUB1*, *NOPI-RFP NAT/NOPI*, *PCK1p-IPLI-*  
228 *HIS1/ipl1::ARG4* (CNV9) that expresses  $\alpha$ -tubulin Tub1 tagged with GFP and  
229 nucleolar marker Nop1 tagged with RFP, and analyzed the morphology of the MTs.  
230 We observed that as compared to the wild-type strain *TUB1-GFP URA3/TUB1*  
231 *NOPI-RFP NAT/NOPI*, *IPLI/IPLI* (12865), both the morphology and dynamics of  
232 MTs were significantly affected in the *ipl1* mutant cells (Fig. 3C). While close to 50%  
233 Ipl1-depleted cells exhibited apparently normal MTs, a fraction of population  
234 exhibited an array of spindle defects ranging from a) short spindle with unsegregated  
235 chromatin (15%), b) short spindle with mis-segregated chromatin (6%), c) aberrant  
236 mitotic spindle with mis-segregated chromatin in the mother cell (17%), d) long  
237 spindle (8%), and, e) forked-shaped or broken spindle (2%) (Fig. 3D). Since most of  
238 the defective spindles were short, we scored the mitotic spindle length by measuring  
239 SPB to SPB distance in the pre-anaphase cells of the wild-type strain *TUB4-GFP-*

240 *URA3/TUB4, TUB1-RFP-HIS1/TUB1, IPL1/IPL1* (CNV13) and Ipl1-depleted strain  
241 *TUB4-GFP-URA3/TUB4 TUB1-RFP-HIS1/TUB1 ipl1::FRT/PCK1p-IPL1* (CNV14)  
242 co-expressing GFP-tagged Tub4 and RFP-tagged Tub1 (Fig. 3E). The cells having the  
243 bud-size (length of the major axis of the cell) of 10-12  $\mu\text{m}$  are considered as the pre-  
244 anaphase cells. Remarkably, while the wild-type pre-anaphase cells had SPBs well-  
245 separated from each other (6-8  $\mu\text{m}$ ), Ipl1-depleted pre-anaphase cells had SPBs  
246 localized significantly closer to each other (2-4  $\mu\text{m}$ ) (Fig. 3F). However, we also  
247 observed single or two very closely spaced foci of SPBs (Tub4-GFP), co-localizing  
248 with the spindle (Tub1-RFP) indicating that Ipl1 depletion possibly results in the  
249 formation of mono-oriented spindles in a smaller percentage of cells. Together, these  
250 results indicate that the Ipl1-depleted cells have difficulties in separating SPBs that  
251 results in a mitotic delay or cell death.

252 *Ipl1 is involved in the bilobed organization of the kinetochores and their attachment*  
253 *with the microtubules*

254 MTs with an opposite polarity overlap in a zone between the two SPBs and are  
255 pushed apart by specialized motors such as plus-end directed motors of the kinesin-5  
256 family, Kip1, and Cin8. Kip1 and Cin8 work together to cluster kinetochores in *S.*  
257 *cerevisiae* (Tytell & Sorger, 2006). In addition, kinesin-8 family, Kip3 is required for  
258 kinetochore positioning along the metaphase spindle (Wargacki *et al.*, 2010). Thus,  
259 we were curious to test whether the organization or spatial geometry of kinetochores  
260 is affected in the Ipl1-depleted cells having aberrantly spaced SPBs. To investigate  
261 the defects in kinetochore geometry and arrangement, we first depleted Ipl1 for 8 h in  
262 cells co-expressing GFP-tagged Dad2 (outer kinetochore) and RFP-tagged Tub1,  
263 *DAD2-GFP-URA3/DAD2, TUB1-RFP-HIS1/TUB1, ipl1::FRT/PCK1p-IPL1*  
264 (CNV19), analysed kinetochore (Dad2-GFP) signals along the spindle-axis (Tub1-

265 RFP), and compared them with the wild-type cells *DAD2-GFP-URA3/DAD2, TUB1-*  
266 *RFP-HIS1/TUB1, IPL1/IPL1* (CNV22). We observed that Ipl1-depleted cells  
267 contained mis-positioned Dad2-GFP foci along the spindle-axis or had abnormally  
268 diffuse GFP lobes as compared to the bilobed distribution of the Dad2-GFP foci  
269 observed in the wild-type cells along the spindle-axis (Fig. 4A). The peak  
270 fluorescence intensity of the Dad2-GFP signals was towards the poles in the wild-  
271 type, while the peak fluorescence intensity of the Dad2-GFP was shifted towards the  
272 spindle equator or along the length of the spindle in the large-budded Ipl1-depleted  
273 cells (Fig. 4B). In addition, we also observed unequally separated kinetochore clusters  
274 in minor percentage of Ipl1-depleted cells. Unequally separated kinetochore clusters  
275 at the mother-daughter cell junction could be due to an accumulation of MTs with  
276 unrectified mono-oriented attachments generated in the cell. Further, we estimated the  
277 number of large-budded Ipl1-depleted cells with defective kinetochore geometry and  
278 kinetochore-microtubule attachments. We found that close to 50% Ipl1-depleted cells  
279 were defective in distribution of the kinetochore clusters (Supporting Information,  
280 Fig. S3A and S3B). We have shown previously that the partial depletion of essential  
281 kinetochore proteins affects the integrity of the kinetochore cluster and stability of the  
282 centromeric histone CENP-A in *C. albicans* (Thakur. & Sanyal., 2012). Therefore, we  
283 further tested whether the mis-organization of kinetochore clusters obtained upon  
284 depletion of Ipl1 also affects the stability and integrity of the centromeric histone  
285 CENP-A. We prepared lysates from *CENP-A/CENP-A-TAP-URA3,*  
286 *ipl1::FRT/PCK1p-IPL1-NAT* cells (CNV17) grown in non-permissive conditions for  
287 various time intervals, and performed western blot analysis to measure the levels of  
288 protein A-tagged CENP-A. We find that the total cellular protein levels of protein A-  
289 tagged CENP-A remain unaltered upon depletion of Ipl1 (Fig. 4C), indicating that the

290 stability of CENP-A remains unaffected upon depletion of Ipl1. Further, we observed  
291 no significant difference in the total mean intensity of CENP-A-GFP signals per  
292 kinetochore cluster in the Ipl1-depleted cells *CENP-A/CENP-A:GFP:CENP-A*,  
293 *ipl1::FRT/PCK1p-IPL1* of CNV27 as compared to the wild-type cells *CENP-*  
294 *A/CENP-A:GFP:CENP-A* (YJB8675) indicating that the kinetochore localization of  
295 CENP-A remains unaltered upon Ipl1 depletion. Similarly, we tested the difference in  
296 the occupancy of CENP-A at the *CENs* in the presence and absence of Ipl1 by  
297 performing chromatin immunoprecipitation (ChIP) in the strains CAKS102 and  
298 CNV17. We find that the occupancy of CENP-A at the *CENs* remains unaffected in  
299 the Ipl1-depleted cells (Fig. 4D and 4E). Together, these lines of evidence indicate  
300 that Ipl1 is required for maintaining the kinetochore geometry during the metaphase-  
301 anaphase transition but dispensable for the integrity of kinetochores in *C. albicans*.

302

303 *Ipl1* depletion results in nuclear mis-segregation which results in aneuploidy-  
304 associated drug resistance

305 Defects in the kinetochore-MT attachments could result in the altered distribution of  
306 kinetochores in *Ipl1*-depleted cells. To test whether defective kinetochore-MT  
307 attachments result in altered ploidy in *C. albicans*, we sought to visualize the  
308 segregation of the duplicated chromatin mass by analyzing the fluorescence of H2B-  
309 tagged with GFP in the wild-type cells, *HTB/HTB-GFP::SAT1 IPL1/IPL1* (RSY15)  
310 and *Ipl1*-depleted strain *HTB/HTB-GFP::SAT1 ipl1::ARG4/PCK1p-IPL1-HIS1*  
311 (CNV24) after growing them in the non-permissive conditions for 8 h. Depletion of  
312 *Ipl1* severely affected the dynamics of nuclear segregation in both budded and  
313 elongated yeast cells (Fig. 5A and 5B). *Ipl1*-depleted cells exhibited five distinct  
314 nuclear segregation phenotypes in a similar ratio a) unsegregated chromatin in the  
315 small-budded cells, b) segregated chromatin between mother and daughter cell, c)  
316 unsegregated chromatin in the large-budded cells with chromatin present in either the  
317 mother cell or unequally segregated chromatin in mother and daughter bud, d)  
318 stretched chromatin in large-budded cells, e) aberrantly segregated chromatin in  
319 pseudo-hyphal/elongated/multi-budded cells. In contrast, the majority of wild-type  
320 cells exhibited either unsegregated chromatin before division in the small-budded cell  
321 or equal segregation of the chromatin mass between mother and daughter cell. A  
322 dramatic increase in the number of large-budded cells having unsegregated or  
323 stretched chromatin in the mutant suggested that there could be a delay in the  
324 segregation of chromatin as a stretched chromatin mass persists for a longer duration  
325 in the mutant cells. To understand the occurrence of these phenotypes, we monitored  
326 the dynamics of separation of the chromatin mass in the live wild-type cells of  
327 *HTB/HTB-GFP::SAT1 IPL1/IPL1* (RSY15) and mutant *Ipl1*-depleted strain, CNV24

328 cells by live-cell imaging for 70 min from the time of inception of the daughter bud  
329 (Fig. 5C, Supporting Information, Movie S1). We observed that Ipl1-depleted cells  
330 exhibit unsegregated or stretched chromatin at the mother-daughter cell junction that  
331 persists for a longer duration as compared to the wild-type. However, there was no  
332 significant difference observed between the average time required for the segregation  
333 of chromatin from the time of the inception of bud in the wild-type cells (mean = 48.5  
334 min) as compared to the subset Ipl1-depleted cells (mean = 50.3 min) which could  
335 finally manage to divide the chromatin mass (Fig. 5D). Despite extended time spent  
336 as a stretched chromatin, how some of the Ipl1-depleted cells segregate the chromatin  
337 mass within the same time frame as that of the wild-type cells is intriguing and  
338 requires further analysis. In conclusion, a delay in the separation of chromatin or  
339 prolonged stretching of chromatin could possibly result in unequal segregation of the  
340 nucleus resulting in death or aneuploidy in Ipl1-depleted cells.

341 *C. albicans* exhibits aneuploidy as an adaptive mechanism in response to stress such  
342 as fluconazole (FLC), the most common drug used for treating *Candida* infections.  
343 Therefore, we tested whether Ipl1-depleted cells carrying aneuploidy display FLC  
344 resistance. For this, we estimated the presence of aneuploidy in Ipl1-depleted cells  
345 grown in non-permissive conditions by flow cytometric analysis (FACS). The  
346 existence of aneuploid cells ( $>4n$ ) in a population of Ipl1-depleted cells in the strain  
347 CNV6 within 4 h of protein depletion further confirmed that Ipl1 is required for  
348 ploidy maintenance in *C. albicans* (Fig. 6A).. Further, to test whether Ipl1-depleted  
349 cells carrying aneuploidy are resistant to FLC, we depleted Ipl1 in two independent  
350 mutants, CNV6 and CNV7 for 4 h and spotted them on the plates containing FLC (64  
351  $\mu\text{g/ml}$ ) along with the wild-type strain, RM1000AH. Indeed, Ipl1-depleted cells  
352 displayed a higher number of FLC resistant colonies as compared to the wild-type

353 (Fig. 6B). Next, we quantified aneuploidy by performing a chromosome loss assay in  
354 Ipl1-depletion mutant strain CNV6 where each homolog of chromosome 7 is marked  
355 by the auxotrophic marker *HIS1* or *ARG4* (Fig. 6C). Natural rate of loss of a  
356 chromosome in the wild-type strain RM1000AH of *C. albicans* is  $<1 \times 10^{-3}$ /  
357 cell/generation (Varshney *et al.*, 2015). We observed that Ipl1-depleted CNV6 mutant  
358 cells exhibited loss of chromosome 7 at a frequency of  $8.2 \times 10^{-3}$ /cell/generation.  
359 Such a higher incidence of chromosome loss in the Ipl1 mutant cells explains the  
360 occurrence of aneuploid cells in the population resulting in FLC resistance. Recently,  
361 chromosome 7 trisomies have been linked to increased fitness of the pathogen in the  
362 human gut niche (Ene *et al.*, 2018). Taken together, these results indicate that Ipl1 is  
363 required for timely and proper chromosome segregation during the cell division to  
364 prevent aneuploidy-associated drug resistance in *C. albicans*.

## 365 **Discussion**

366 In this work, we show that Aurora B kinase Ipl1 localizes to the kinetochores from the  
367 G1/S phase till metaphase and associates with the mitotic spindle from metaphase till  
368 the mitotic spindle disassembles in anaphase. Ipl1 possesses an unusual activation  
369 loop, is required for cellular viability and morphogenesis in polymorphic budding  
370 yeast *C. albicans*. Ipl1 plays a critical role in orchestrating the MT dynamics and  
371 facilitates the timely separation of SPBs. Even though Ipl1 is not directly involved in  
372 maintaining structural integrity and clustering of kinetochores in *C. albicans*, it is  
373 required for the maintenance of kinetochore geometry to form bilobed structures  
374 along the mitotic spindle to facilitate spindle bi-orientation. As expected Ipl1-  
375 depletion results in untimely nuclear division leading to erroneous kinetochore-MT  
376 attachments resulting in aneuploidy-associated anti-fungal drug resistance. Taken  
377 together, Ipl1 regulates the process of chromosome segregation by correcting



378 erroneous kinetochore-MT attachments and modulating the synchronous movement  
379 of kinetochores along the mitotic spindle in the human pathogen *C. albicans* (Fig. 7).  
380 MTs are highly dynamic structures that control cell shape, cell division, motility, and  
381 differentiation (Poulain & Sobel, 2010). The dynamics of MTs is modulated by MT  
382 regulatory proteins such as MAPs, +TIPs, and motor proteins. Several kinases  
383 spatiotemporally regulate the activities of these proteins for timely execution of the  
384 cell cycle. The spatiotemporal regulation by these kinases differs as some of the  
385 proteins are sequestered in different cellular compartments such as the nucleus or  
386 cytoplasm during various stages of cell cycle. (Janke, 2014, Wloga & Gaertig, 2010,  
387 Janke & Bulinski, 2011). In different organisms, activities of MT regulatory proteins  
388 have been shown to be tightly regulated by Aurora kinase for the proper execution of  
389 mitosis (Blangy *et al.*, 1995, Ohi *et al.*, 2004). Here, we show the role of Aurora  
390 kinase/Ipl1 in the spatiotemporal regulation of the MT dynamics in an ascomyceteous  
391 pathogenic polymorphic fungus *C. albicans*, which has one of the smallest known  
392 eukaryotic mitotic spindles of  $\sim 0.8 \mu\text{m}$  (McCoy *et al.*, 2015, Berman, 2006, Brand,  
393 2012). It exhibits various cellular morphologies and provides an opportunity to  
394 determine the role of mitotic spindle properties in regulating the cell dimensions. It is  
395 an ideal system to explore various features of MT dynamics during mitosis at  
396 relatively smaller length scales where aneuploidy is tolerated under harsh host  
397 conditions.

398 While exploring the possible roles of Ipl1 in orchestrating MT dynamics during  
399 different stages of cell cycle, we observed that Ipl1 depleted cells have defective  
400 spindle morphologies. Further analysis of the SPB-to-SPB distance in the wild-type  
401 and Ipl1-depleted cells revealed that Ipl1 depletion leads to an aberrant SPB  
402 separation which may result in a mitotic delay or cell death. On the contrary, *ipl1-2*

403 cells of *S. cerevisiae* do not exhibit any gross morphological differences in the spindle  
404 morphology (Biggins *et al.*, 1999). In addition, *ipl1-2* cells exhibit no difference in the  
405 separation of the SPBs throughout the cell cycle as compared to the wild-type  
406 (Biggins *et al.*, 1999). Interestingly, another allele of Ipl1, *ipl1-315* is required for the  
407 centrosome-mediated process of spindle assembly in the absence of the BimC motor  
408 protein, Cin8 (Kotwaliwale *et al.*, 2007). Aurora-B kinase also facilitates chromatin-  
409 mediated spindle assembly by inhibiting MCAK in vertebrates (Sampath *et al.*, 2004).  
410 Therefore, we speculate that in *C. albicans*, Ipl1 regulates the chromatin-mediated  
411 spindle assembly through phosphorylation of the yeast MCAK-like protein Kip3 or  
412 facilitates MTOC-mediated spindle assembly by phosphorylating kinesin-5 motors  
413 such as Cin8. It is noteworthy that the *C. albicans* genome has only one member of  
414 the kinesin-5 motor, i.e., Kip1 (Chua *et al.*, 2007) and an additional kinesin motor,  
415 Kip99. Kip1 deletion mutants in *C. albicans* exhibit polarised growth and defects in  
416 SPB separation (Chua *et al.*, 2007).

417 *ipl1-321* cells in *S. cerevisiae* display highly asymmetric distribution of Ndc80-GFP  
418 signals indicating presence of syntelic attachments in the cell (Marco *et al.*, 2013).  
419 Under the influence of Ipl1, syntelic attachments get corrected and form more stable  
420 bipolar attachments (Tanaka. *et al.*, 2002, Pinsky & Biggins, 2005, Pinsky *et al.*,  
421 2006). Ipl1-depleted cells in *C. albicans* results in heterogeneity in the phenotype of  
422 kinetochore distribution suggesting functions of Ipl1 at different stages of cell cycle.  
423 We speculate that in addition to the well-conserved function of Ipl1 in correcting  
424 syntelic attachments, Ipl1 may also be involved in recapturing of monotelic  
425 attachments and maintenance of bilobed kinetochore organisation along the mitotic  
426 spindle in *C. albicans*.

427 Mutations in the essential gene *IPL1* results in aneuploidy and /or elevated ploidy in  
428 *S. cerevisiae* (Zhu *et al.*, 2016). Interestingly, acquisition of aneuploidy provides  
429 fitness to another ascomyceteous budding yeast *C. albicans* in response to anti-fungal  
430 drugs such as FLC (Gerstein & Berman, 2015). *C. albicans* cells acquire multiple  
431 aneuploid chromosomes just after few generations when grown in the presence of  
432 FLC (Selmecki *et al.*, 2009). We find that reduced levels of Ipl1 in *C. albicans* results  
433 in altered ploidy and exhibit FLC resistance. It is possible that the clinical strains  
434 isolated from the patients treated with anti-fungal drugs acquire mutations in *IPL1*  
435 which enable it to survive better in the host environment. Together, Ipl1  
436 spatiotemporally modulates the dynamics of ipMTs/kMTs possibly by regulating  
437 kinesin-related motors and ensures bipolar spindle formation and bilobed geometry of  
438 kinetochores to prevent aneuploidy in the pathogenic budding yeast *C. albicans*.

### 439 **Experimental procedures**

#### 440 *Yeast strains, plasmids, and media conditions*

441 Strains and primers used in this study are listed in the Supporting Information  
442 Table S1 and Supporting Information Table S2 respectively.

#### 443 *Construction of the conditional mutant of IPL1 in RM1000AH*

444 The conditional mutant strains of *IPL1* were constructed by deleting the first allele  
445 of *IPL1* (C6\_02320C) with the CaNAT flipper cassette (Reuss *et al.*, 2004) and by  
446 replacing the promoter of the second allele with the *PCK1* promoter (Leuker *et*  
447 *al.*, 1997). To delete the first copy, a CaNAT flipper deletion cassette was  
448 constructed using the plasmid pSFS2a. The 3' untranslated region (UTR) of the  
449 *IPL1* ORF was amplified from the SC5413 genomic DNA using oligos (NV13  
450 and NV14) listed in the Supporting Information Table S2 and cloned into NotI  
451 and SacII sites of the plasmid pSFS2a to obtain pNV1. The 3' UTR of the *IPL1*

452 ORF was amplified using oligos NV11 and NV12 and cloned into KpnI and XhoI  
453 sites of pNV1 to obtain pNV2. The strain RM1000AH was transformed with  
454 pNV2 digested with KpnI and SacII by the lithium acetate procedure and the  
455 transformants were selected on YPDU plates containing nourseothricin (100  
456 µg/ml). The transformants were screened for the stable integrants of digested  
457 linear DNA fragments into the genome at the right locus first by PCR using oligos  
458 (NV22 and NATmidF) and subsequently by Southern hybridization using a probe  
459 region amplified by NV76 and NV77 (Supporting Information Fig. S3A). The  
460 correct transformants (CNV4) were grown in YPM (1% yeast extract, 2%  
461 peptone, 2% maltose) supplemented with uridine (0.1 µg/ml) and plated on YPDU  
462 plates to recycle the *NAT* marker. Single colonies were replica plated on YPDU  
463 and YPDU + NAT (100 µg/ml) plates. *Nou<sup>s</sup>* colonies were selected and confirmed  
464 by Southern hybridization for the first copy *ipl1* deletion followed by removal of  
465 the marker gene using a probe region (Supporting Information Table S2). In the  
466 resulting strains CNV5, the remaining wild-type allele of *IPL1* was placed under  
467 the control of the *PCK1* promoter. To generate the *PCK1p-IPL1* cassette, the 5'  
468 UTR was amplified with primers NV63 and NV12 (Supporting Information Table  
469 S2) and cloned into KpnI and XhoI sites of pBS II KS (-) to obtain pNV7. The  
470 *CaURA3* sequence was obtained as a HindIII digest from pCaURA3 and cloned  
471 into the HindIII site of pNV7 to obtain pNV8. Subsequently, the 5' coding region  
472 of the *IPL1* ORF including the start codon was amplified with primers NV35 and  
473 NV36 (Supporting Information Table S2) and cloned into BamHI and NotI sites  
474 of pNV8. Finally, the *PCK1* promoter containing fragment obtained from pCAO1  
475 (Leuker *et al.*, 1997) was cloned into the BamHI site of pNV9 to obtain the final  
476 construct as pNV10. pNV10 was digested with SacII and NotI and was used to

477 transform CNV5 to give rise to CNV6 and CNV7 (see Supporting Information  
478 Table S1 for the genotypes of the strains). The conditional mutants were  
479 confirmed by PCR using oligos (NV88 and NV102) listed in the Table S2. The  
480 transformants were further confirmed by Southern hybridization using a probe  
481 region amplified by NV76 and NV77 (Supporting Information Fig. S3A).

482 *Construction of the conditional mutant of IPL1 in strains expressing GFP-tagged*  
483 *CENP-A, Dad2, and Tub4 co-expressing RFP-tagged Tub1 and protein A-tagged*  
484 *CENP-A*

485 To study the dynamics of kinetochore proteins and SPBs, conditional *ipl1* mutants  
486 were constructed in the strains expressing GFP tagged CENP-A, Dad2, Tub1 and  
487 Tub4 respectively. To study the enrichment of CENP-A at the *CEN*, the  
488 conditional *ipl1* mutant was constructed in the strain containing protein-A-tagged  
489 CENP-A. The first copy of *IPL1* was replaced with a recyclable *NAT* in the  
490 strains, YJB8675, YJB10742, LSK111 and CAKS102 (see Supporting  
491 Information Table S1 for genotypes). In the resulting strains, CNV25, CNV18,  
492 CNV10, and CNV15 respectively, the *NAT* marker was first recycled and the  
493 remaining wild-type copy of *IPL1* was placed under the *PCK1* promoter. To  
494 construct the *PCK1p-IPL1* cassette with a *NAT* marker, the *PCK1p-IPL1*  
495 containing fragment was amplified from the genomic DNA of CNV5 using oligos  
496 (NV102 and NV103) listed in the Supporting Information Table S2 and cloned  
497 into the NotI and SacII sites of the plasmid pBSNAT to obtain pPCK1-IPL1-  
498 NAT. The plasmid was linearized with NsiI and was used to transform CNV26,  
499 CNV11, CNV19 and CNV16 to obtain CNV27, CNV12, CNV20 and CNV17,  
500 respectively. The strains were confirmed by PCR using oligos (NV88 and NV102)  
501 mentioned in the Supporting Information Table S2. Further, these conditional

502 mutants were confirmed by their ability to form pseudo-hyphal cells under non-  
503 permissive media conditions.

504 To simultaneously localize tubulin in the strains, CNV14, CNV22, YJB10742 and  
505 LSK111, a plasmid containing 3' UTR of *TUB1* cloned in frame with *RFP*  
506 harboring *HIS1* marker was linearized with *Xba*I. The linearized DNA was  
507 transformed into YJB10742, CNV12, LSK111, and CNV20 to obtain CNV21,  
508 CNV14, CNV13 and CNV22 respectively. The transformed were screened by  
509 microscopy for the correct integration of the cassette.

510 *Construction of the conditional mutant of IPL1 in strains expressing GFP-tagged*  
511 *Tub1*

512 The conditional mutant of *IPL1* was constructed in the strain carrying GFP-tagged  
513 *Tub1* and RFP-tagged *Nop1*. To delete the first allele, an *IPL1* deletion cassette  
514 was constructed with *ARG4* as the selection marker. The recyclable *NAT* marker  
515 present in pNV2 was replaced by *ARG4* using oligos (NV251 and NV252) listed  
516 in the Supporting Information Table S2 to construct pNV2ARG4. The plasmid  
517 was digested with *Kpn*I and *Sac*II, and transformed into 12856 to obtain CNV8.  
518 The correct integrants were confirmed by PCR using oligos, NV22 and NV271  
519 mentioned in the Supporting Information Table S2. The second allele of *IPL1* was  
520 placed under the *PCK1* promoter using *HIS1*. The *PCK1p-IPL1* fragment was  
521 amplified using primers, NV102 and NV103, from the genomic DNA of CNV5  
522 and cloned into the *Not*I and *Sac*II sites of pBSHIS to construct  
523 pBSPCK1IPL1HIS. The plasmid was linearized and used to transform CNV8 to  
524 obtain CNV9. The resulting strain was confirmed by their ability to form pseudo-  
525 hyphal cells under non-permissive conditions.

526 *Construction of a strain expressing double GFP epitope-tagged Ipl1 under the*  
527 *native promoter and Ndc80 tagged with RFP*

528 To study the subcellular localization of Ipl1 under the native promoter, we  
529 constructed the strain expressing Ipl1-tagged with a double GFP at its C-terminus  
530 under the native promoter in the strain CNV2. The 3' coding sequence of *IPL1*  
531 excluding the stop codon was amplified with the oligos (NV124 and NV125)  
532 listed in the Supporting Information Table S2 and cloned into the NotI and SpeI  
533 sites of pBSGFP<sub>HIS1</sub>, to construct pBSIPL1GFP<sub>HIS1</sub>. Another fragment of *GFP*  
534 ORF was amplified using oligos (NV250 and SR67) and inserted into the SpeI site  
535 of pBSIPL1GFP<sub>HIS1</sub> to obtain pBSIPL1-2GFP. After confirming the orientation  
536 of GFP by HpaI, the plasmid was linearized with XbaI and was used to transform  
537 to obtain CNV2. Further, to simultaneously localize IPL1 and Ndc80, we  
538 constructed a plasmid where the C-terminus of Ndc80 was cloned into SacII and  
539 SpeI sites of pRFPARG4 using oligos (NV448 and NV449) listed in the Table S2.  
540 The resulting plasmid pNdc80-RFP-ARG4 was linearized with XhoI and was  
541 used to transform the strain CNV2 to obtain CNV3. The transformants were  
542 screened for the presence of RFP tagged Ndc80 by microscopy.

543 *Construction of a strain expressing IPL1-TAP*

544 To study the dynamic subcellular localization of Ipl1 and study its expression, we  
545 constructed the strain expressing *IPL1* tagged with a Protein-A epitope (Puig *et al.*,  
546 2001) under its native promoter (CNV1). The 3' UTR was amplified using oligos  
547 listed in the Supporting Information Table S2 (NV15 and NV16) and cloned into the  
548 SpeI and NotI sites of pBS II KS (-) to obtain pBSDSTAP. Subsequently, the Protein-  
549 A epitope with an auxotrophic marker *CaURA3*, amplified from the plasmid pPK335

550 (Puig *et al.*, 2001) by oligos NV17 and NV18, listed in the Supporting Information  
551 Table S2 and 5' UTR amplified from the SC5314 genomic DNA using oligos NV19  
552 and NV20, listed in the Supporting Information Table S2 were cloned into BamHI  
553 and SpeI, and XhoI and BamHI sites of pBSDSTAP respectively, as a three-piece  
554 ligation reaction to obtain pBSIPL1TAPDS. The resulting plasmid was digested with  
555 XhoI and NotI and was used to transform BWP17 to obtain CNV1. The correct  
556 integrants were screened by PCR using oligos (NV34 and NV11) listed in the  
557 Supporting Information Table S2. The expression of Ipl1-Prot-A as a fusion protein  
558 was confirmed by western blotting using anti-protein A antibodies.

559 *Construction of the conditional mutant of IPL1 in a strain expressing GFP-tagged*  
560 *histone H2B*

561 The conditional mutant of *IPL1* was constructed in the strain carrying GFP-tagged  
562 *H2B* (RSY15) obtained from Bennett's Laboratory (Sherwood & Bennett, 2008).  
563 To delete the first allele, an *IPL1* deletion cassette constructed with *ARG4* as the  
564 selection marker, pNV2ARG4 (construction described previously) was used. The  
565 plasmid pNV2ARG4 was digested with KpnI and SacII, and transformed into  
566 strain RSY15 to obtain CNV23. The second allele of *IPL1* was placed under the  
567 *PCK1* promoter using PCK1p-HIS1 cassette. The plasmid pBSPCK1IPL1HIS was  
568 linearized and used to transform CNV23 to obtain CNV24. The conditional  
569 mutant strain was further confirmed by their ability to form pseudo-hyphal cells  
570 under non-permissive conditions.

571 *Media and growth conditions*

572 The conditional mutant strains carrying *IPL1* under the control of the *PCK1*  
573 promoter were grown in YPS (1% yeast extract, 2% peptone, 2% succinate) as a



574 permissive medium and YPD (1% yeast extract, 2% peptone, 2% dextrose) as a  
575 non-permissive medium. All the *C. albicans* strains were grown at 30°C.

#### 576 *Live-cell imaging*

577 The conditional mutant strains were grown overnight in the permissive medium  
578 and re-inoculated in the non-permissive media for 4 h. These cells were pelleted at  
579 4,000 rpm and washed once with 1x phosphate buffered saline (PBS). The cell  
580 suspension was placed on the slide containing a thin 2% agarose patch prepared in  
581 dextrose and the patch was covered with a coverslip. Live-cell imaging was  
582 performed at 30°C on an inverted confocal microscope (ZEISS, LSM-880)  
583 equipped with a temperature-control chamber (Pecon incubator, XL multi SL), a  
584 Plan Apochromat 100x NA oil 1.4 objective and GaAsp photodetectors. For time-  
585 lapse microscopy of histone H2B-GFP, images were collected at a 60-s interval  
586 with 0.2% intensity exposure with 0.5 µm Z-steps using GFP filter lines  
587 (GFP/FITC 488 for excitation and GFP/FITC 500/550 band-pass for emission).  
588 All the images were displayed after the maximum intensity projection of images  
589 at each time using ImageJ.

#### 590 *Microscopic image acquisition and processing*

591 The conditional mutant strains were grown till  $OD_{600}=1$  in the permissive medium  
592 and re-inoculated in the non-permissive media for 8 h. These cells were pelleted at  
593 4,000 rpm and washed once with 1x phosphate buffered saline (PBS) before the  
594 cell suspension was placed on a thin growth medium containing 2% agarose patch  
595 present on the slide. A coverslip was placed on the patch and processed for  
596 imaging. The images were acquired at room temperature using laser scanning  
597 inverted confocal microscope LSM 880-Airyscan (ZEISS, Plan Apochromat 63x,

598 NA oil 1.4) or Leica SP8. The filters used were GFP/FITC 488, mCherry 561 for  
599 excitation. GFP/FITC 500/550 band pass or GFP 495/500 and mCherry 565/650  
600 or mCherry 580-750 band pass for emission. Z- stack images were taken at every  
601 0.3  $\mu\text{m}$  and processed using ZEISS Zen software/ImageJ. All the images were  
602 digitally altered with minimal adjustments to levels and linear contrast till the  
603 signals were highlighted.

#### 604 *Post-acquisition analysis*

605 The distance between the two spindle pole bodies was measured after the 3D  
606 rendering of confocal images with IMARIS 7.6.4 software (Bitplane, Zurich,  
607 Switzerland). Images were filtered by Gaussian smoothing and a surface was  
608 created using a threshold of absolute intensity. Radii of the SPB spots were  
609 determined by taking a half of the longest diameters for each SPB spot measured  
610 in an individual stack in Imaris. The distances were obtained in statistics of  
611 processed images and these values were used to calculate SPB-to-SPB distance.

#### 612 *Immunoblotting*

613 Wild-type and mutant cells were grown under permissive and non-permissive  
614 conditions for the indicated time points. The cells of  $\text{OD}_{600}=3$  were harvested and  
615 washed with 1x PBS. The cells were resuspended in 12.5% TCA and lysates were  
616 precipitated at 13000 rpm for 10 min and washed with 80% acetone. The pellet  
617 was dried and resuspended in the lysis buffer (0.1 N NaOH, 1% SDS). The  
618 samples were diluted in 5x SDS loading dye (5%  $\beta$ -mercaptoethanol, 0.02%  
619 Bromophenol blue, 30% glycerol, 10% SDS, 250 mM Tris-Cl pH 6.8) and  
620 denatured. Denatured samples were subjected to electrophoresis using 10% SDS  
621 PAGE and transferred to a nitrocellulose membrane for 45 min at 25 V by semi-

622 dry method (Bio-Rad). The membranes were blocked with 5% skim milk  
623 containing 1x PBS (pH 7.4) for 1 h at the room temperature followed by its  
624 incubation with primary antibodies in 2.5% skim milk overnight at 4°C. After  
625 three 10 min washes in PBST (1x PBS, 0.05% Tween) solution, the membranes  
626 were incubated in solutions containing secondary antibodies in 2.5% skim milk  
627 for 2 h. The membranes were washed with PBST (1X PBS, 0.05% Tween)  
628 solution thrice and the signals were detected using chemiluminescence method  
629 (SuperSignal West Pico Chemiluminescent Substrate, Thermo Scientific, Cat. No.  
630 34080).

### 631 *Southern blotting*

632 A high-quality genomic DNA was isolated from all the samples and quantified  
633 using the Quantity One software (Bio-Rad). An equal amount of DNA was  
634 digested with a suitable restriction enzyme and resolved on 1% agarose gel in 1x  
635 TAE buffer. The gel containing the resolved DNA was placed on a graduated  
636 scale and was imaged using Quantity One software (Bio-Rad). Subsequently, the  
637 gel was sequentially treated with 0.25 M HCl for acid nicking of DNA,  
638 denaturation buffer and, neutralization buffer. Acid nicked denatured DNA was  
639 then transferred to a Zeta-probe GT Nylon membrane in 10x SSC Buffer (Saline-  
640 Sodium Citrate) by capillary transfer method for 24-48 h. Following transfer, the  
641 membrane was washed with 2x SSC, dried and exposed to UV for 5 min in  
642 Genelinker (Bio-Rad) (12000  $\mu$ J x 100) for cross-linking DNA with the  
643 membrane. The blot was pre-hybridized for 2-4 h in 10 ml of 1x Southern  
644 hybridization buffer at 65°C. Meanwhile, a probe was radio-labeled with  $\alpha$  <sup>32</sup> P  
645 dCTP using Klenow polymerase and random primer. The radio-labeled probe was  
646 prepared using a random primer labeling kit (BRIT-LCK-2). First, a mixture of 2

647  $\mu$ l 50 ng PCR amplified DNA and 17  $\mu$ l distilled water was boiled and chilled  
648 immediately for 5 min. Further, other reagents such as 5  $\mu$ l random primer buffer,  
649 12  $\mu$ l of a cocktail of dNTPs except the radioactive dNTP, 5  $\mu$ l  $\alpha$  <sup>32</sup> P dCTP and 2  
650  $\mu$ l Klenow polymerase enzyme were added to the mixture and the reaction  
651 mixture was incubated at 37°C for 30 min. The reaction was stopped by adding 2  
652  $\mu$ l 0.5 M EDTA. After adding 50  $\mu$ l 1x TE, the labeled probe was purified by  
653 passing through a Sephadex-G-50 column. The pre-hybridized blot was incubated  
654 with the purified radio-labeled probe overnight at 65°C. The blot was rinsed with  
655 wash buffer I once followed by wash buffer II, thrice at 65°C. The hybridized  
656 membrane was exposed to Phosphorimager films and images captured by  
657 Phosphorimager using the Image Reader FL2A5000 Ver.2 software.

#### 658 *Flow cytometry*

659 A 5 ml culture of *C. albicans* cells grown till OD<sub>600</sub>=0.5 was harvested, washed,  
660 resuspended in 100  $\mu$ l sterilized water and fixed with 1 ml 70% ethanol overnight  
661 at 4°C. Cells were washed and resuspended in 100  $\mu$ l of RNase buffer. Cells were  
662 then treated with 10  $\mu$ l RNase A (10 mg/ml) for 4 h at 37°C. Cells were washed  
663 with 1x PBS resuspended in 900  $\mu$ l of 1x PBS and incubated overnight at 4°C.  
664 Cells were stained with (0.005  $\mu$ g/ml) propidium iodide for 30 min in dark  
665 conditions, just prior to the data acquisition. After a brief sonication (10 amp for  
666 10 sec), data from 10,000 cells per time point were collected using a FACS  
667 Calibur.

#### 668 *Chromatin-immunoprecipitation (ChIP)*

669 Chromatin-immunoprecipitation (ChIP) followed by PCR was done as mentioned  
670 previously (Sanyal *et al.*, 2004). An asynchronous culture was grown in YPD till

671 OD<sub>600</sub>=1.0. Cells were cross-linked with 37% formaldehyde for 15 min. Next,  
672 the samples were quenched by adding 125 mM glycine. Further, the sonication  
673 was performed with Biorupter (Diagenode) to obtain sheared chromatin fragments  
674 of an average size of 300-500 bp. The fragments were immuno-precipitated with  
675 anti-Protein-A antibodies at a working concentration of 20 µg/ml. The immune-  
676 precipitated fragments were next incubated with the Protein-A sepharose beads.  
677 The ChIP DNA obtained from anti-protein-A ChIP assays were analyzed by  
678 qPCR and oligos that amplify central regions of *CEN1* and *CEN7*. The presence  
679 of background immuno-precipitated DNA was detected by qPCR and oligos that  
680 amplify non-centromeric DNA. For anti-Protein-A ChIP analysis, qPCR was  
681 performed on a Rotor-Gene 6000 real-time PCR machine with iQ<sup>TM</sup> SYBR Green  
682 Super Mix. The cycling parameters used are as follows: 94°C for 30 s, 55°C for 30  
683 s and 72°C for 45 s repeated 40 times. The CENP-A enrichment was quantified by  
684 percent input method.

#### 685 *Antibodies*

686 Primary antibodies used for western blot analysis were mouse anti-protein A  
687 antibodies (dilution 1:5000) (Sigma, Cat. No. P3775) and mouse anti-PSTAIRES  
688 (dilution 1:2000) (Abcam, Cat. No.10345). Secondary antibodies used are goat  
689 anti-mouse HRP conjugated antibodies (dilution 1:10,000) (Bangalore Genei, Cat.  
690 No. HP06).

#### 691 *Anti-fungal drug resistance assay*

692 The wild-type and Ipl1-depleted cells grown in the non-permissive condition for 4  
693 h were 10-fold serially diluted and spotted on plates containing the non-  
694 permissive medium having indicated concentrations of fluconazole (Sigma, Cat.

695 No. F8929-100 MG) and incubated further at 30°C for the antifungal drug  
696 resistance assay.

### 697 *Statistical analyses*

698 Statistical differences were determined using paired Student's *t*-test to calculate  
699 the statistical significance using a column type mean with the SD or SEM using  
700 Prism 7 software.

### 701 **Acknowledgments**

702  
703 We thank B. Suma and S. Kumar at the confocal imaging facility of the Molecular  
704 Biology and Genetics Unit, JNCASR, and P. Iyer at the imaging facility at  
705 ACTREC, Navi Mumbai, India for assisting in image analysis. We thank Aswathy  
706 Narayanan for performing spotting experiments. We thank J Berman, Tel Aviv  
707 University and R. Bennett, Brown University for providing us with strains and J.  
708 Morschhäuser, Universität Würzburg for the *SATI* flipper cassette plasmid. This  
709 work was partially supported by the Tata Innovation Fellowship  
710 (BT/HRD/35/01/03/2017) and intramural financial support from JNCASR to KS.  
711 NV was supported by a fellowship from the Council of Scientific & Industrial  
712 Research (CSIR), India. The authors declare no competing interests.

### 713 **Authors contributions**

714 Conceived and designed the experiments: NV and KS. Contributed reagents and  
715 conducted the experiments: NV. Analyzed the data: NV and KS. Wrote the paper:  
716 NV and KS.

### 717 **References**

718 Andrews., P., D., E. Knatko., W.J. Moore. & J. Swedlow., R., (2003) Mitotic mechanics:  
719 the auroras come into view. *Curr Opin Cell Biol.* **15**: 672-683.

- 720 Barton, R. & K. Gull, (1988) Variation in cytoplasmic microtubule organization and  
721 spindle length between the two forms of the dimorphic fungus *Candida*  
722 *albicans*. *J Cell Sci* **91 ( Pt 2)**: 211-220.
- 723 Berman, J., (2006) Morphogenesis and cell cycle progression in *Candida albicans*.  
724 *Curr Opin Microbiol* **9**: 595-601.
- 725 Berman, J., (2012) *Candida albicans*. *Curr Biol* **22**: R620-622.
- 726 Biggins, S., F.F. Severin, N. Bhalla, I. Sassoon, A.A. Hyman & A.W. Murray, (1999) The  
727 conserved protein kinase Ipl1 regulates microtubule binding to kinetochores  
728 in budding yeast. *Genes Dev* **13**: 532-544.
- 729 Biggins, S., F. Severin, F., N. Bhalla, I. Sassoon, A. Hyman, A. & A. Murray, W., (1999)  
730 The conserved protein kinase Ipl1 regulates microtubule binding to  
731 kinetochores in budding yeast. *Genes Dev.* **1**: 532-544.
- 732 Blangy, A., H.A. Lane, P. d'Herin, M. Harper, M. Kress & E.A. Nigg, (1995)  
733 Phosphorylation by p34cdc2 regulates spindle association of human Eg5, a  
734 kinesin-related motor essential for bipolar spindle formation in vivo. *Cell* **83**:  
735 1159-1169.
- 736 Brand, A., (2012) Hyphal growth in human fungal pathogens and its role in virulence.  
737 *Int J Microbiol* **2012**: 517529.
- 738 Brown, G.D., D.W. Denning, N.A. Gow, S.M. Levitz, M.G. Netea & T.C. White, (2012)  
739 Hidden killers: human fungal infections. *Sci Transl Med* **4**: 165rv113.
- 740 Buvelot, S., S.Y. Tatsutani, D. Vermaak & S. Biggins, (2003) The budding yeast  
741 Ipl1/Aurora protein kinase regulates mitotic spindle disassembly. *J Cell Biol*  
742 **160**: 329-339.
- 743 Carmena, M. & W. Earnshaw, C., (2003) The cellular geography of aurora kinases.  
744 *Nat Rev Mol Cell Biol* **4**: 842-854.
- 745 Chan, C.S.M. & D. Botstein, (1993) Isolation and Characterization of Chromosome-  
746 Gain and Increase-in-Ploidy Mutants in Yeast. *Genetics* **135**: 677-691.
- 747 Cheeseman, I., M., S. Anderson, M. Jwa., E. Green, M., J. Kang, J. Yates, R., III., C.  
748 Chan, S., D. Drubin, G. & G. Barnes, (2002) Phospho-regulation of  
749 kinetochore-microtubule attachments by the Aurora kinase Ipl1p  
750 *Cell* **111**: 163-172.
- 751 Chua, P.R., D.M. Roof, Y. Lee, R. Sakowicz, D. Clarke, D. Pierce, T. Stephens, M.  
752 Hamilton, B. Morgan, D. Morgans, T. Nakai, A. Tomasi & M.E. Maxon, (2007)  
753 Effective killing of the human pathogen *Candida albicans* by a specific  
754 inhibitor of non-essential mitotic kinesin Kip1p. *Mol Microbiol* **65**: 347-362.
- 755 Ene, I.V., R.A. Farrer, M.P. Hirakawa, K. Agwamba, C.A. Cuomo & R.J. Bennett, (2018)  
756 Global analysis of mutations driving microevolution of a heterozygous diploid  
757 fungal pathogen. *Proc Natl Acad Sci U S A*.
- 758 Finley, K.R., K.J. Bouchonville, A. Quick & J. Berman, (2008) Dynein-dependent  
759 nuclear dynamics affect morphogenesis in *Candida albicans* by means of the  
760 Bub2p spindle checkpoint. *J Cell Sci* **121**: 466-476.
- 761 Francisco, L. & C.S.M. Chan, (1994) Regulation of yeast chromosome segregation by  
762 Ipl1 protein kinase and type 1 protein phosphatase. *Cell Mol Biol Res.* **40**:  
763 207-213.
- 764 Frazer, C., M. Joshi, C. Delorme, D. Davis, R.J. Bennett & J.S. Allingham, (2015)  
765 *Candida albicans* Kinesin Kar3 Depends on a Cik1-Like Regulatory Partner



- 766 Protein for Its Roles in Mating, Cell Morphogenesis, and Bipolar Spindle  
767 Formation. *Eukaryot Cell* **14**: 755-774.
- 768 Gerstein, A.C. & J. Berman, (2015) Shift and adapt: the costs and benefits of  
769 karyotype variations. *Curr Opin Microbiol* **26**: 130-136.
- 770 Giet, R. & C. Prigent, (1999) Aurora/Ipl1p-related kinases, a new oncogenic family of  
771 mitotic serine-threonine kinases. *J Cell Sci* **112**: 3591-3601.
- 772 Janke, C., (2014) The tubulin code: molecular components, readout mechanisms, and  
773 functions. *J Cell Biol* **206**: 461-472.
- 774 Janke, C. & J.C. Bulinski, (2011) Post-translational regulation of the microtubule  
775 cytoskeleton: mechanisms and functions. *Nat Rev Mol Cell Biol* **12**: 773-786.
- 776 Joglekar, A.P., E.D. Salmon & K.S. Bloom, (2008) Counting kinetochore protein  
777 numbers in budding yeast using genetically encoded fluorescent proteins.  
778 *Methods Cell Biol* **85**: 127-151.
- 779 Kang, J., M. Cheeseman, I., G. Kallstrom., S. Velmurugan., G. Barnes. & C. Chan., S.,  
780 (2001) Functional cooperation of Dam1, Ipl1, and the inner centromere  
781 protein (INCENP)-related protein Sli15 during chromosome segregation. **155**:  
782 763-774.
- 783 Kim., J., H., J. Kang., S. & C. Chan., S., (1999) Sli15 associates with the ipl1 protein  
784 kinase to promote proper chromosome segregation in *Saccharomyces*  
785 *cerevisiae*. *J Cell Biol* **145**: 1381-1394.
- 786 Kotwaliwale, C.V., S.B. Frei, B.M. Stern & S. Biggins, (2007) A pathway containing the  
787 Ipl1/aurora protein kinase and the spindle midzone protein Ase1 regulates  
788 yeast spindle assembly. *Dev Cell* **13**: 433-445.
- 789 Kotwaliwale., C., V., S. Frei., B., B. Stern., M. & S. Biggins., (2007) A pathway  
790 containing the Ipl1/aurora protein kinase and the spindle midzone protein  
791 Ase1 regulates yeast spindle assembly. *Dev Cell* **13**: 433-445.
- 792 Leuker, C.E., A. Sonneborn, S. Delbrück & J.F. Ernst, (1997) Sequence and promoter  
793 regulation of the PCK1 gene encoding phosphoenolpyruvate carboxykinase of  
794 the fungal pathogen *Candida albicans*. *Gene* **192**: 235-240.
- 795 Marco, E., J.F. Dorn, P.H. Hsu, K. Jaqaman, P.K. Sorger & G. Danuser, (2013) *S.*  
796 *cerevisiae* chromosomes biorient via gradual resolution of syntely between S  
797 phase and anaphase. *Cell* **154**: 1127-1139.
- 798 Martin, R., A. Walther & J. Wendland, (2004) Deletion of the dynein heavy-chain  
799 gene DYN1 leads to aberrant nuclear positioning and defective hyphal  
800 development in *Candida albicans*. *Eukaryot Cell* **3**: 1574-1588.
- 801 McCoy, K.M., E.S. Tubman, A. Claas, D. Tank, S.A. Clancy, E.T. O'Toole, J. Berman &  
802 D.J. Odde, (2015) Physical limits on kinesin-5-mediated chromosome  
803 congression in the smallest mitotic spindles. *Mol Biol Cell* **26**: 3999-4014.
- 804 Ohi, R., T. Sapa, J. Howard & T.J. Mitchison, (2004) Differentiation of cytoplasmic  
805 and meiotic spindle assembly MCAK functions by Aurora B-dependent  
806 phosphorylation. *Mol Biol Cell* **15**: 2895-2906.
- 807 Pinsky, B.A. & S. Biggins, (2005) The spindle checkpoint: tension versus attachment.  
808 *Trends Cell Biol* **15**: 486-493.
- 809 Pinsky, B.A., C. Kung, K.M. Shokat & S. Biggins, (2006) The Ipl1-Aurora protein kinase  
810 activates the spindle checkpoint by creating unattached kinetochores. *Nat*  
811 *Cell Biol* **8**: 78-83.



- 812 Poulain, F.E. & A. Sobel, (2010) The microtubule network and neuronal  
813 morphogenesis: Dynamic and coordinated orchestration through multiple  
814 players. *Mol Cell Neurosci* **43**: 15-32.
- 815 Puig, O., F. Caspary, G. Rigaut, B. Rutz, E. Bouveret, E. Bragado-Nilsson, M. Wilm & B.  
816 Séraphin, (2001) The tandem affinity purification (TAP) method: a general  
817 procedure of protein complex purification. *Methods* **24**: 218-229.
- 818 Reuss, O., A. Vik, R. Kolter & J. Morschhauser, (2004) The SAT1 flipper, an optimized  
819 tool for gene disruption in *Candida albicans*. *Gene* **341**: 119-127.
- 820 Robert, X. & P. Gouet, (2014) Deciphering key features in protein structures with the  
821 new ENDscript server. *Nucleic Acids Res* **42**: W320-324.
- 822 Robinson, L.C., J. Phillips, L. Brou, E.P. Boswell & K. Tatchell, (2012) Suppressors of  
823 *ipl1-2* in components of a Glc7 phosphatase complex, Cdc48 AAA ATPase,  
824 TORC1, and the kinetochore. *G3 (Bethesda)* **2**: 1687-1701.
- 825 Roy, B., L.S. Burrack, M.A. Lone, J. Berman & K. Sanyal, (2011) CaMtw1, a member of  
826 the evolutionarily conserved Mis12 kinetochore protein family, is required for  
827 efficient inner kinetochore assembly in the pathogenic yeast *Candida*  
828 *albicans*. *Mol Microbiol* **80**: 14-32.
- 829 Sampath, S.C., R. Ohi, O. Leismann, A. Salic, A. Pozniakovski & H. Funabiki, (2004) The  
830 chromosomal passenger complex is required for chromatin-induced  
831 microtubule stabilization and spindle assembly. *Cell* **118**: 187-202.
- 832 Sanyal, K., (2012) How do microbial pathogens make CENs? *PLoS Pathog* **8**:  
833 e1002463.
- 834 Sanyal, K., M. Baum & J. Carbon, (2004) Centromeric DNA sequences in the  
835 pathogenic yeast *Candida albicans* are all different and unique. *Proc Natl*  
836 *Acad Sci U S A* **101**: 11374-11379.
- 837 Sanyal, K. & J. Carbon, (2002) The CENP-A homolog CaCse4p in the pathogenic yeast  
838 *Candida albicans* is a centromere protein essential for chromosome  
839 transmission. *Proc Natl Acad Sci U S A* **99**: 12969-12974.
- 840 Selmecki, A., A. Forche & J. Berman, (2006) Aneuploidy and isochromosome  
841 formation in drug-resistant *Candida albicans*. *Science* **313**: 367-370.
- 842 Selmecki, A., M. Gerami-Nejad, C. Paulson, A. Forche & J. Berman, (2008) An  
843 isochromosome confers drug resistance in vivo by amplification of two genes,  
844 *ERG11* and *TAC1*. *Mol Microbiol* **68**: 624-641.
- 845 Selmecki, A.M., K. Dulmage, L.E. Cowen, J.B. Anderson & J. Berman, (2009)  
846 Acquisition of aneuploidy provides increased fitness during the evolution of  
847 antifungal drug resistance. *PLoS Genet* **5**: e1000705.
- 848 Sherwood, R.K. & R.J. Bennett, (2008) Microtubule motor protein Kar3 is required for  
849 normal mitotic division and morphogenesis in *Candida albicans*. *Eukaryot Cell*  
850 **7**: 1460-1474.
- 851 Tanaka., T., U., N. Rachidi., C. Janke., G. Pereira., M. Galova., E. Schiebel., M. Stark.,  
852 J., R. & K. Nasmyth., (2002) Evidence that the *Ipl1-Sli15* (Aurora kinase-  
853 INCENP) complex promotes chromosome bi-orientation during mitosis by  
854 altering kinetochore–spindle pole connections. *Cell* **108**: 317-329.
- 855 Thakur, J. & K. Sanyal, (2012) A coordinated interdependent protein circuitry  
856 stabilizes the kinetochore ensemble to protect CENP-A in the human  
857 pathogenic yeast *Candida albicans*. *PLoS Genet* **8**: e1002661.

- 858 Thakur., J. & K. Sanyal., (2012) A Coordinated Interdependent Protein Circuitry  
859 Stabilizes the Kinetochores Ensemble to Protect CENP-A in the Human  
860 Pathogenic Yeast *Candida albicans*. *PLoS Genetics* **8**: 1-16.
- 861 Turner, S.A. & G. Butler, (2014) The *Candida* Pathogenic Species Complex. *Cold  
862 Spring Harbor Perspectives in Medicine* **a019778**.
- 863 Tytell, J.D. & P.K. Sorger, (2006) Analysis of kinesin motor function at budding yeast  
864 kinetochores. *J Cell Biol* **172**: 861-874.
- 865 Varshney, N., A. Schaeckel, R. Singha, T. Chakraborty, L. van Wijlick, J.F. Ernst & K.  
866 Sanyal, (2015) A surprising role for the Sch9 protein kinase in chromosome  
867 segregation in *Candida albicans*. *Genetics* **199**: 671-674.
- 868 Wargacki, M.M., J.C. Tay, E.G. Muller, C.L. Asbury & T.N. Davis, (2010) Kip3, the yeast  
869 kinesin-8, is required for clustering of kinetochores at metaphase. *Cell Cycle*  
870 **9**: 2581-2588.
- 871 Wloga, D. & J. Gaertig, (2010) Post-translational modifications of microtubules. *J Cell  
872 Sci* **123**: 3447-3455.
- 873 Woodruff., J., B., D. Drubin., G. & G. Barnes., (2010) Mitotic spindle disassembly  
874 occurs via distinct subprocesses driven by the anaphase-promoting complex,  
875 Aurora B kinase, and kinesin-8. *J Cell Biol* **191**: 795-808.
- 876 Zhu, Y.O., G. Sherlock & D.A. Petrov, (2016) Whole Genome Analysis of 132 Clinical  
877 *Saccharomyces cerevisiae* Strains Reveals Extensive Ploidy Variation. *G3  
878 (Bethesda)* **6**: 2421-2434.
- 879 Zimniak., T., K. Stengl., K. Mechtler. & S. Westermann., (2009) Phosphoregulation of  
880 the budding yeast EB1 homologue Bim1p by Aurora/Ipl1p. *J Cell Biol* **186**.

881

## 882 **Figure legends**

883

884 **Figure 1. Dynamic localization of Ipl1 in *C. albicans*.** (A) Localization of Ipl1 in  
885 the wild-type CNV3 cells co-expressing Ipl1-2xGFP and a kinetochores marker,  
886 Ndc80-RFP in interphase and mitotic cells. During S- phase and metaphase, Ipl1 co-  
887 localizes with Ndc80. During anaphase, Ipl1 localizes to the spindle. Bar, 5µm. (B)  
888 Localization of Ipl1 in the wild-type CNV3 cells co-expressing Ipl1-2xGFP and a  
889 kinetochores marker, Ndc80-RFP upon treatment with DMSO and nocodazole (NOC),  
890 20 µg/ml. (C) Quantification of Ipl1-2xGFP signal intensities at the kinetochores in  
891 the DMSO and NOC treated wild-type cells.

892 **Figure 2. Ipl1 depletion induces aberrant morphological states in *C. albicans*.** (A)  
893 The regulation of the *PCK1* promoter used to control the expression of *IPL1*. The  
894 cells of wild-type RM1000AH and Ipl1 depletion mutants, CNV6 and CNV7 were  
895 streaked on the plates containing permissive and non-permissive media. The plates  
896 were photographed after 3 days of incubation at 30°C. (B) Reduction in the size of  
897 colonies in Ipl1-depleted CNV6 cells as compared to the wild-type RM1000AH cells  
898 in the non-permissive conditions. (C) Microscopic images of the Ipl1 mutant cells of  
899 CNV6 after growth in non-permissive conditions for the indicated time-points. Scale  
900 5µm. (D) The diagrammatic representation and quantification of enlarged and  
901 complex morphological phenotypes obtained in Ipl1-depleted cells of CNV6 as

902 compared to the wild-type cells of RM1000AH after growth in the non-permissive  
903 conditions at the indicated time intervals.

904 **Figure 3. Ipl1-depleted cells are defective in the microtubule dynamics and**  
905 **spindle pole body (SPB) separation.** (A) The thiabendazole (TBZ)-sensitivity assay  
906 depicting the altered dynamics of the MTs in Ipl1-depleted cells grown in the non-  
907 permissive conditions for 4 h. The wild-type RM1000AH and Ipl1-depleted CNV6  
908 and CNV7 cells were 10-fold serially diluted and spotted on the non-permissive  
909 medium containing TBZ (40 $\mu$ g/ml). DMF was used as a no-drug control. (B) The  
910 temperature-sensitivity assay corroborating the perturbed MT structures in Ipl1-  
911 depleted cells grown in the non-permissive conditions for 4 h. (C) Microscopic  
912 images of cells having GFP-Tub1 and RFP-Nop1 depicting structural changes of MTs  
913 and nucleolus in the Ipl1-depleted CNV9 cells as compared to wild-type 12856. Bar,  
914 5 $\mu$ m. Cartoons representing different types of MTs with respect to the nucleolus  
915 observed in the wild-type and mutant cells (right). (D) Quantification of MTs of  
916 altered structures in the conditional mutant of *ipl1* after growth in the non-permissive  
917 conditions for 8 h. (E) Microscopic images of cells having GFP-Tub4 and RFP-Tub1  
918 depicting the distance between the two SPBs in the pre-anaphase cells of the wild-  
919 type strain CNV13 and Ipl1-depletion mutant strain CNV14. Chromosomes in  
920 majority of the wild-type cells exhibit bipolar attachments while significant  
921 proportion of the Ipl1-depleted cells exhibit chromosomes with that lack bipolar  
922 attachments. Bar, 5 $\mu$ m. (F) Quantification of the distances between the SPBs  
923 measured in the wild-type and Ipl1-depleted pre-anaphase cells having the bud-size of  
924 8-16  $\mu$ m.

925 **Figure 4. Depletion of Ipl1 leads to disorganization and improper attachment of**  
926 **kinetochores.** (A) Images of the organization of kinetochores (Dad2-GFP) along the  
927 spindle axis (Tub1-RFP) in the wild-type CNV21 and *ipl1* mutant CNV22 cells. The  
928 kinetochores remained clustered in the large-budded wild-type cells with the peak  
929 fluorescence intensity towards the spindle poles, while the kinetochores were  
930 declustered/disorganized with the peak fluorescence intensity shifted towards the  
931 spindle mid-zone in the large-budded Ipl1-depleted cells (zoomed). (B) Histogram  
932 plot indicated the fluorescence intensity of Tub1-RFP (red) and Dad2-GFP (green),  
933 (indicated with black arrows) along the spindle axis in the wild-type and Ipl1 mutant  
934 cells showing organized and disorganized kinetochores respectively. (C) The levels of  
935 CENP-A expression in cell lysates prepared from CNV17 cells after the indicated  
936 time of incubation in non-permissive media conditions. Western blot analysis was  
937 done using anti-TAP and anti-PSTAIRE antibodies. (D) Images of CENP-A-GFP  
938 localization in CNV27 cells grown in permissive and non-permissive conditions. (E)  
939 Quantitative real-time PCR (qPCR) were performed in the *ipl1* mutant strain grown in  
940 permissive and non-permissive conditions for 8 h for enrichment of CENP-A-Prot-A  
941 at the core *CEN7* and *CEN1* after normalizing with the non-*CEN*. Enrichment of  
942 CENP-A at the *CEN* was calculated as a percentage of the total chromatin input and  
943 values were plotted as mean of two independent experiments (three technical  
944 replicates for each experiment).

945 **Figure 5. Defective separation of chromatin in Ipl1-depleted cells.** (A)  
946 Microscopic analysis of the distribution of chromatin between mother and daughter

947 buds in the budded cells of wild-type RSY15 and Ipl1-depletion mutant CNV24  
948 carrying histone H2B-GFP. All the phenotypes were classified into five classes (1-5)  
949 Bar 5 $\mu$ m. **(B)** Quantification of the chromatin distribution phenotypes in the wild-type  
950 and Ipl1-depleted cells classified into five classes (1-5, shown below the bar graph).  
951 Cartoons below each class show cellular morphologies (gray) the chromatin mass  
952 (black). **(C)** Snapshots from a time-lapse movie of nuclear segregation in the wild-  
953 type and Ipl1-depleted cells at the indicated time point from the time of inception of  
954 bud till the segregation. The nucleus is marked by histone H2B-GFP. Bar 5 $\mu$ m. The  
955 formation of the stretched chromatin mass is marked with a yellow arrow in each  
956 case. **(D)** Quantification of the time (min) required for chromatin segregation during  
957 cell division from the inception of bud in the wild-type and Ipl1-depleted cells.

958 **Figure 6. Altered ploidy in Ipl1-depleted cells results in drug resistance.** **(A)** Dot-  
959 plots representing the altered morphology and DNA content measured in the wild-  
960 type and Ipl1-depleted cells using flow cytometry after growth in the non-permissive  
961 conditions at the indicated time-points. **(B)** Anti-fungal drug resistance assays  
962 corroborating aneuploidy in the Ipl1-depleted cells grown in non-permissive  
963 conditions for 4 h. The wild-type and Ipl1-depleted cells were 10-fold serially diluted  
964 and spotted on the non-permissive medium containing FLC (64  $\mu$ g/ml). **(C)**  
965 Schematic depicting mis-segregation of chromosome 7.

966 **Figure 7. Model showing the role of Ipl1 in bipolarity establishment in *C.***  
967 ***albicans*.** Schematic of formation of equal bipolar kinetochore clusters during mitotic  
968 progression in the wild-type cells of *C. albicans* (above). The activity of Ipl1 (high,  
969 medium and low) is differentially regulated during different stage of the cell cycle,  
970 shown in the gradient colors of grey. Reduction in the activity of Ipl1 at different  
971 stages results in accumulation of cells with multiple defects, (I) accumulation of cells  
972 with syntelic attachments resulting in unequal distribution of kinetochore clusters, (II)  
973 accumulation of cells with monotelic attachments resulting in formation of monopolar  
974 kinetochore cluster and (III) accumulation of cells with asynchronous arrangement of  
975 kinetochores resulting disorganised kinetochores clusters.

976

**A**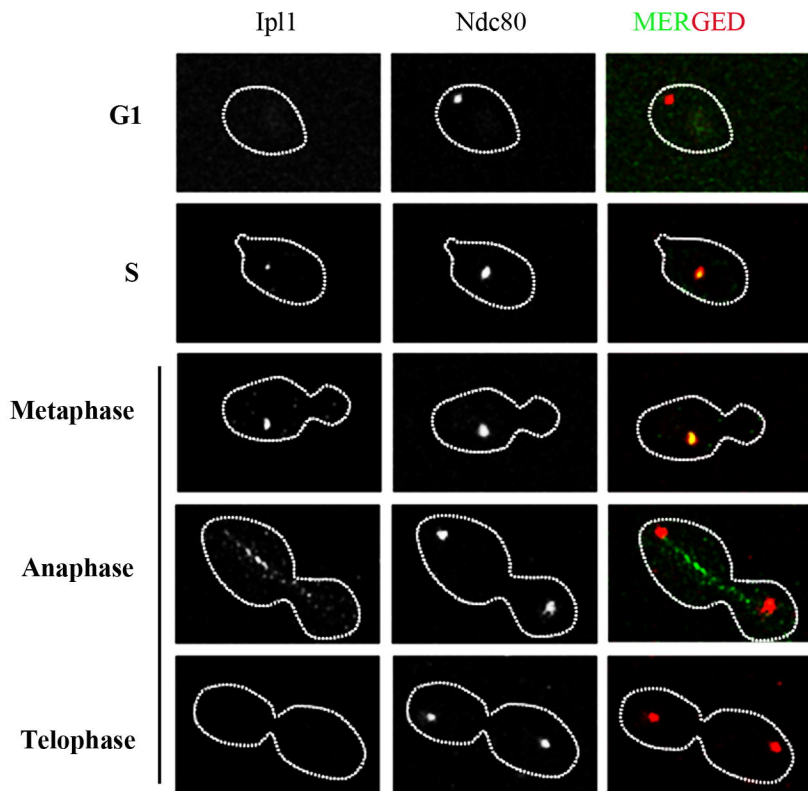**B**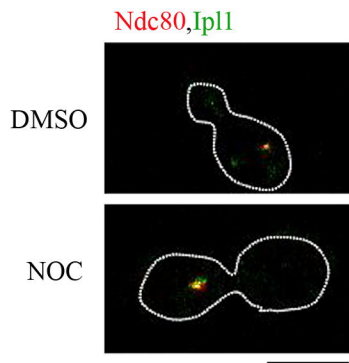**C**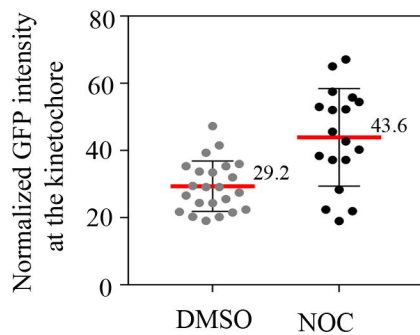

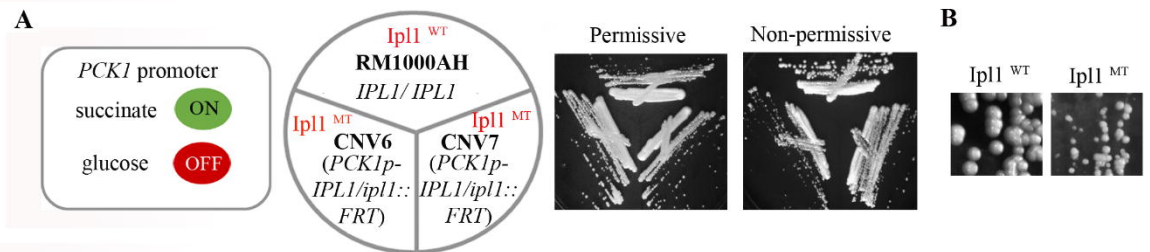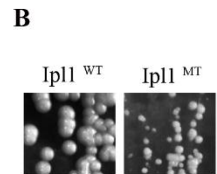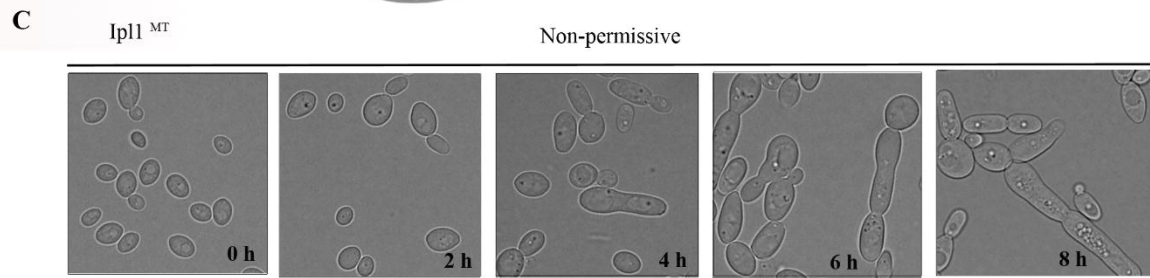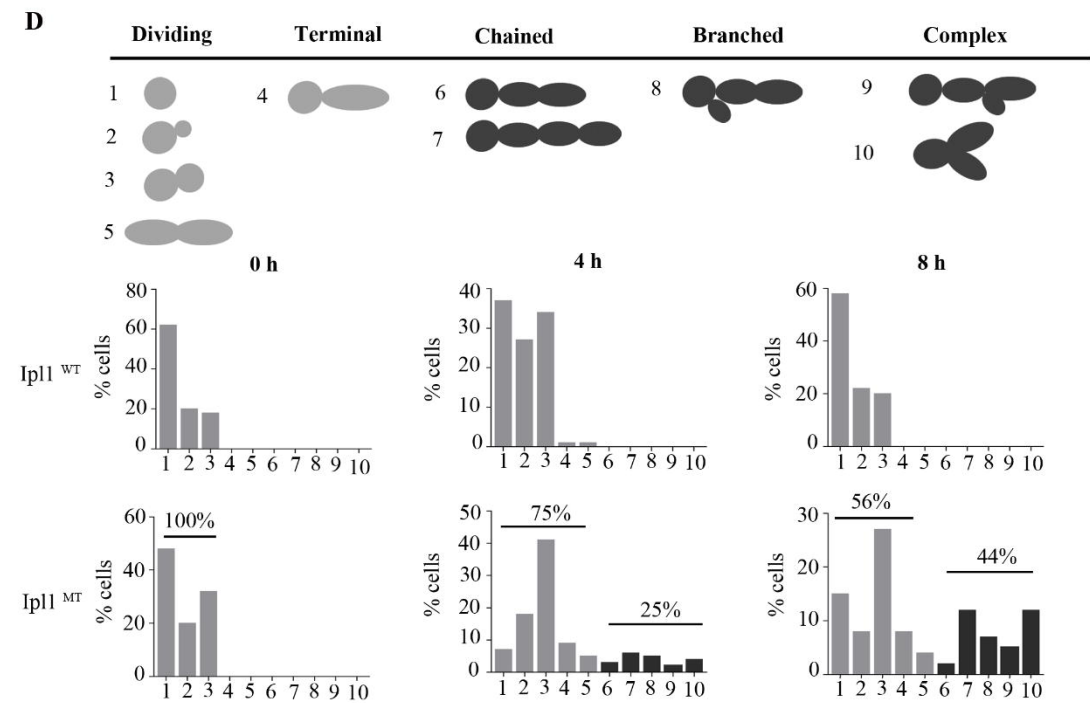



**A**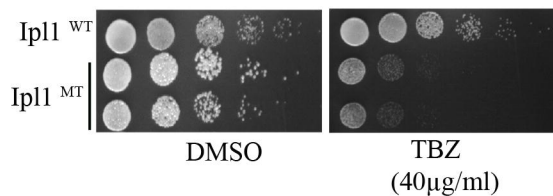**B**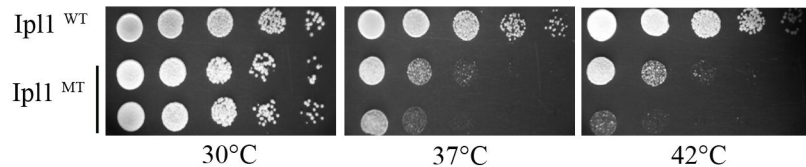**C**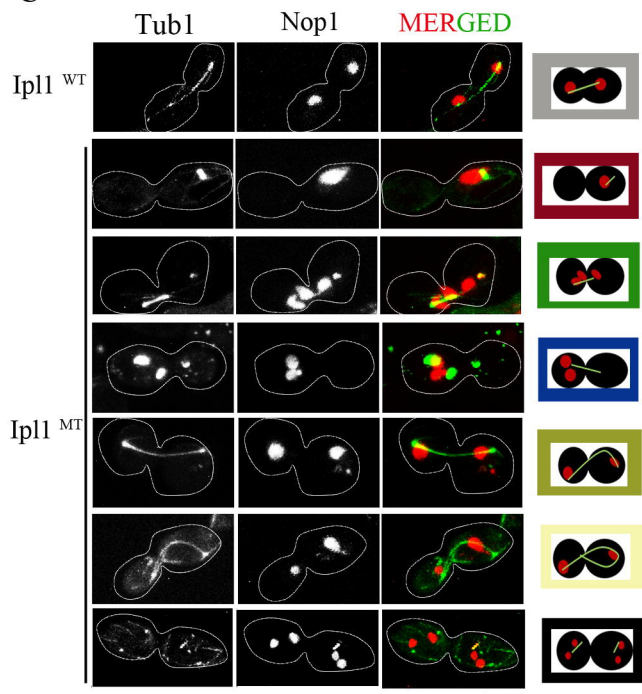**D**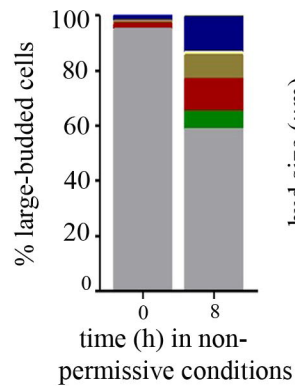**F**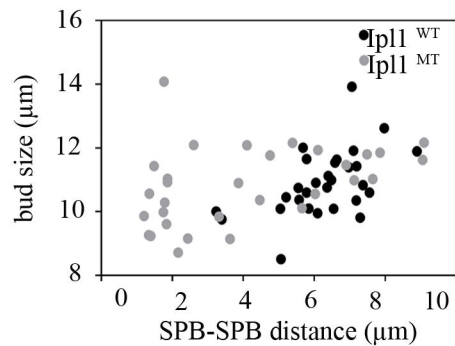**E**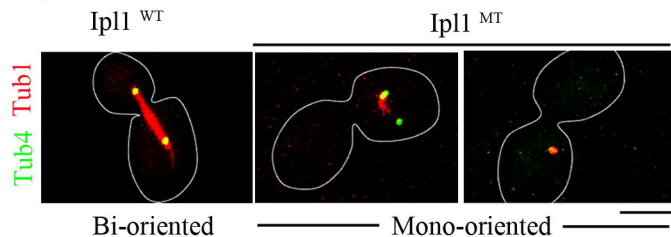

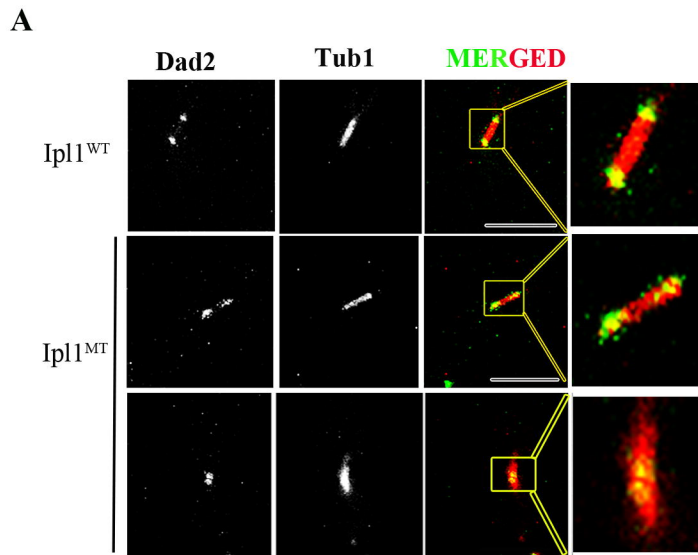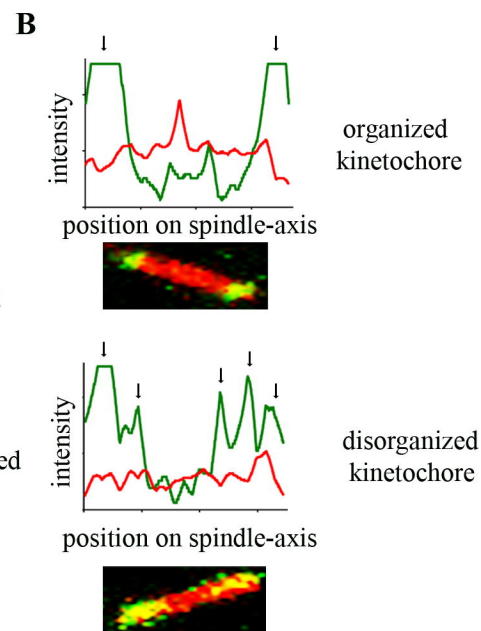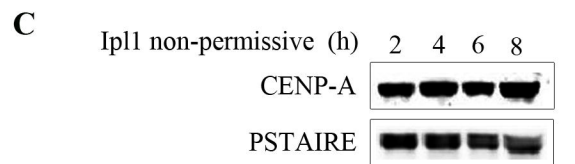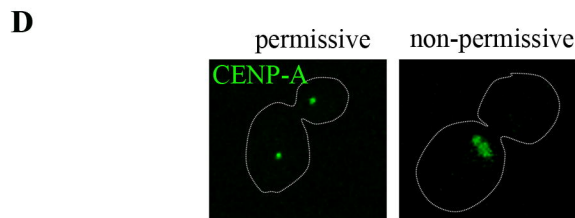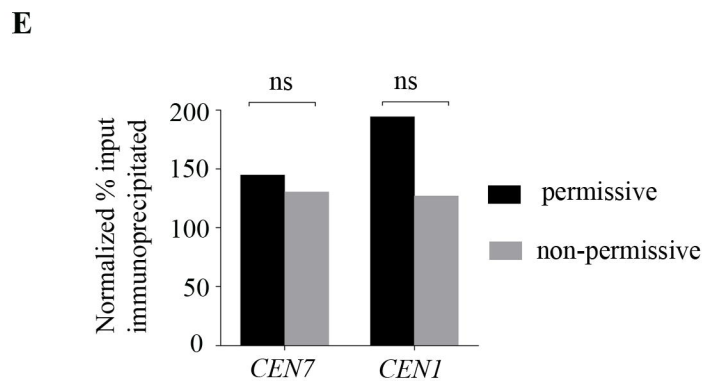



**A**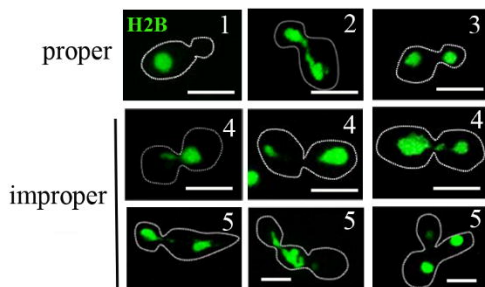**B**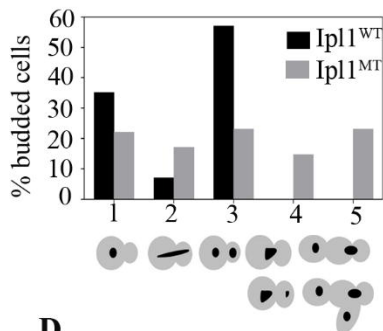**C**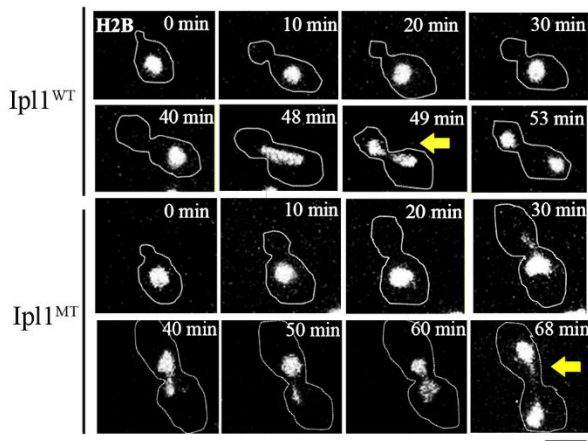**D**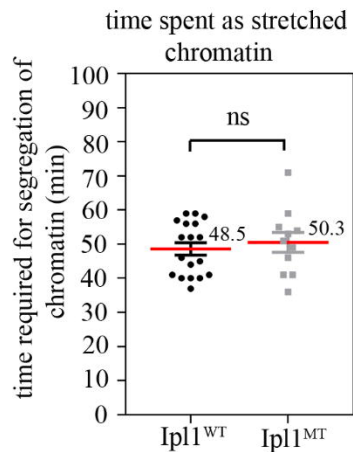

**A**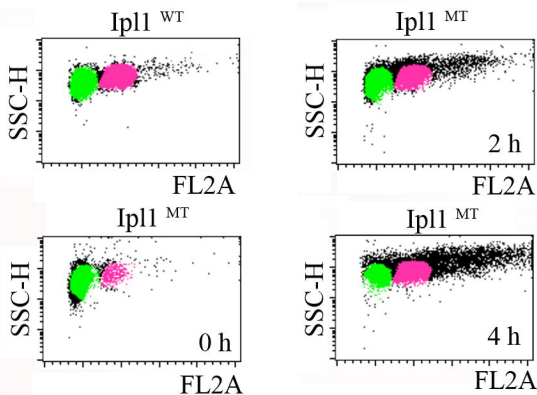

DNA content      ■ 2n      ■ 4n

**B**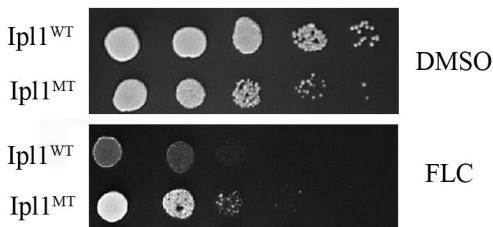**C**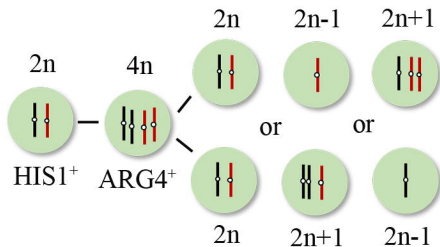

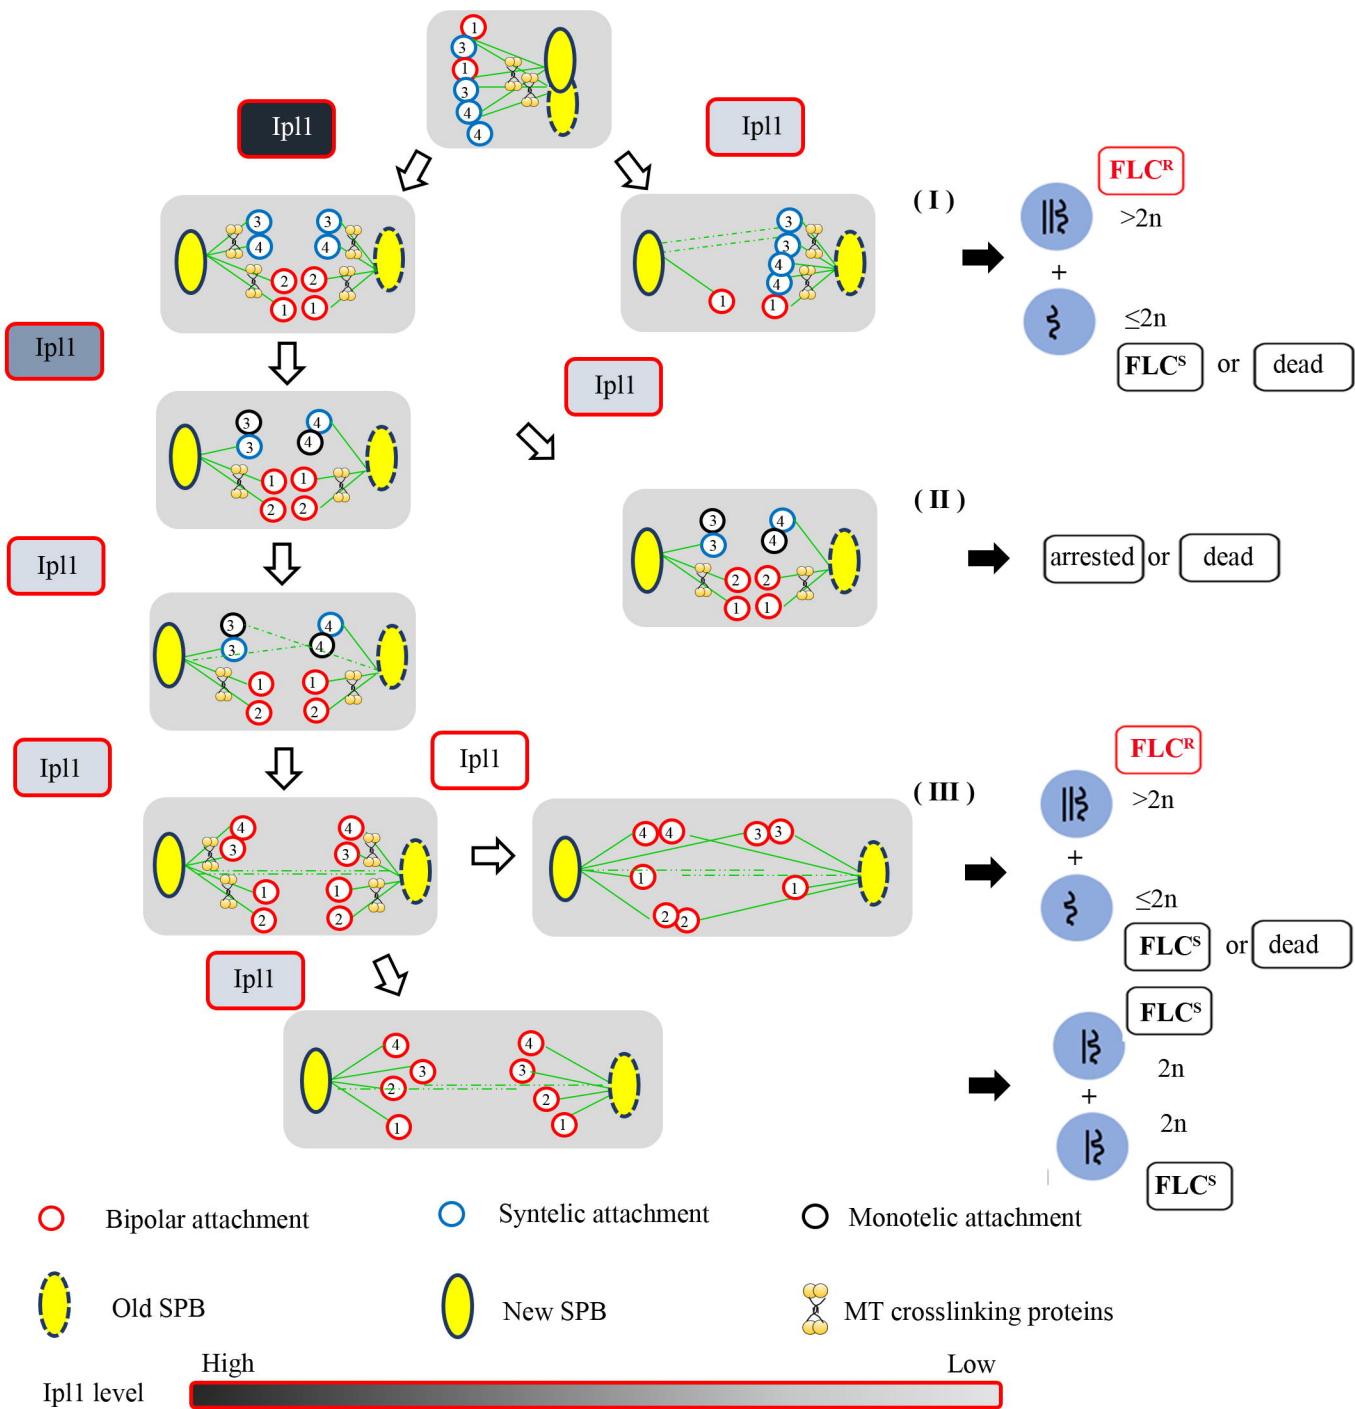

Source: https://www.biorxiv.org/content/10.1101/542605v1.full.pdf
